26 against Cr, *B. safensis* against Cu, *B. piscis* and *B. subtilis* (TSW-17) against Pb and *B.*  
27 *licheniformis* and *B. thuringiensis* against Zn. The autochthonous fungal and bacterial strains can  
28 therefore be employed to clean metal contaminated environments.

29

30 **Keywords:** *Bacillus*; biosorption potential; heavy metals; tannery solid waste; *Trichoderma*

31 **Abbreviations:**

32 TSW: tannery solid waste

33 HMs: heavy metals

34

35 **Introduction**

36 Heavy metals (HMs) pose a serious threat to mankind through increased levels in  
37 agricultural lands, water bodies and natural ecosystems. They can be categorized into non-essential  
38 metals (As, Cd, Cr, Hg, Ni and Pb) and essential metals (Cu, Fe and Zn) [1]. Various sources of  
39 HMs include agricultural activity, industrial effluents, fertilizers, mining and solid waste dumping  
40 sites as well as atmospheric sources. Toxic metals have no role in biological pathways and their  
41 excess can induce dermatitis, cancer, damage to renal circulation, liver and nervous tissues, while  
42 long-term exposure may lead to death [2]. As industrialization train is unstoppable, fight with  
43 heavy metal contamination needs innovative remediation strategies. Awareness for treatment and  
44 remediation of metal-containing wastes to threshold level before release into natural environment  
45 has been growing globally.

46 Efficient, cost-effective and environment-friendly practices are needed for fine-tuning of  
47 waste management. Microbial application is considered an economic and efficient way to  
48 remediate HMs from water and soil [3]. Microbes can use inorganic contaminants as a source of

49 energy via activating metabolic processes. Success of the bioremediation process depends on the  
50 nature, degree and depth of contaminants, polluted site, environmental policies and cost. Besides,  
51 other factors like pH, temperature, nutrient level, oxygen concentrations and abiotic factors also  
52 affect bioremediation. The high surface-to-volume ratio of microbes and their potential to  
53 remediate metals are considered as the key reason to prefer them.

54         Studies have demonstrated that indigenous strains that reside in the polluted environments  
55 have a significant ability to endure toxic metals. Among the microbial entities, filamentous fungi  
56 can grow rapidly and survive in harsh environments. On the contrary, bacteria are ubiquitous  
57 biological entities on earth that can reproduce and survive in a variety of environments due to their  
58 small size, ease of cultivation on a variety of media and rapid growth [4]. Over time, they have  
59 developed resistance against toxic metals to survive in polluted areas because of the high surface-  
60 to-volume ratio.

61         Mostly, metal-resistant fungal strains have been suggested as bioagents for remediating  
62 metal-contaminated sites [5]. The composition of fungal cell wall provides active sites for metal  
63 sequestration. Preliminary step in the biosorption is a passive process involving various metal  
64 binding activities like physical adsorption, ion exchange and complexations, while active process  
65 allows the metal to penetrate in the cells. Bacterial application for remediation is a low-input  
66 biotechnological practice that is safer and more reliable than conventional methods and can  
67 improve soil fertility, characteristics, and quality. For remediation of polluted sites, different  
68 resistant bacterial strains have been used for decades [6]. The mechanisms adopted by bacteria to  
69 detoxify the metal contaminants are metal exclusion, active transport of metal, biosorption,  
70 bioaccumulation, biomineralization, and biotransformation.

71 Metal-resistant plant growth-promoting microbes are being used to control the  
72 metalliferous sites in a productive and eco-friendly way [7]. These microbes not only boost the  
73 plant growth process by producing chelators but also reduce the availability of metals to plants.  
74 The aim to remediate metals is possible only if the biological entities can resist and tolerate the  
75 toxic metals by their physiological and molecular mechanisms [8]. *Trichoderma pseudokoningii*,  
76 isolated from TSW, along with AM fungi have been shown to improve growth of *Tagetes patula*  
77 in TSW amended soil [9]. Moreover, a synergistic interaction has been observed among  
78 *Trichoderma pseudokoningii* and natural or synthetic PGRs to improve growth in pearl millet  
79 grown in TSW amended soil [10].

80 Tannery solid waste represents a metal toxic environmental situation, and it is presumed  
81 that it can harbor metal resistant microbes. This is the first comprehensive study of autochthonous  
82 microbes from tannery solid waste and their tolerance levels and biosorption efficiency against  
83 HMs.

84 Therefore, this is the first study of its kind with aims:

- 85 1. to isolate and characterize the heavy metal resistance of strains of fungi and bacteria  
86 against a particular metal or multi-metal environment
- 87 2. to observe the most efficient multi-metal resistant strains in synthetic metal solutions
- 88 3. to identify the potent strains on a molecular basis for possible future use in  
89 bioremediation of metal laden environment.

## 90 **Materials and Methods**

### 91 **1. Sampling of tannery solid waste**

92 Tannery solid waste samples were gathered from solid waste landfill site of KTWMA,  
93 Depalpur Road, Kasur, Pakistan. Twenty-five random samples were collected with at least 10 m

94 distance between every two samples. The material was taken in pre-labeled sterile bags,  
95 transported to the laboratory and stored at 4°C for further use.

## 96 **2. Isolation of fungi**

97 One gram of TSW sample from each bag was suspended into 10 mL of sterile water  
98 followed by serial dilutions up to  $10^6$ . About 50  $\mu$ L dilution was pipetted on 2% ME agar plates  
99 using a glass spreader under complete aseptic conditions in a culture room followed by incubation  
100 at  $25\pm 3^\circ\text{C}$  for 5-7 days. The fungal colonies that appeared were isolated in new plates. Fungal  
101 strains were purified as single spore isolates from mature cultures by spreading conidia with a  
102 sterile platinum loop.

## 103 **3. Morphological characterization of fungal strains**

104 The fungal strains grown on ME agar medium were morphologically characterized. For  
105 slide preparation, a small mycelial plug was mounted onto the slide in lactophenol followed by  
106 observation under compound microscope. The morphological characterization up to genus level  
107 was performed according to the taxonomic key provided by [11] and [12].

## 108 **4. Isolation of bacteria**

109 One gram of TSW sample was mixed into 10 mL of autoclaved distilled water and serial  
110 dilutions (up to  $10^6$ ) were prepared. By using spread plate method, 50  $\mu$ L sample was pipetted onto  
111 LB agar plates followed by incubation at  $37^\circ\text{C}$  for 24 h. Based on morphological properties,  
112 bacterial colonies were selected and streaked on new agar plates to get single purified colonies.

## 113 **5. Biochemical characterization of bacterial strains**

114 The biochemical characterization of bacterial strains was performed by the methods of  
115 [13]. The test performed under biochemical characterization were gram staining, spore staining,  
116 catalase, oxidase, starch test, Voges Proskauer, and methyl red.

## 117 **6. Heavy metal resistance assay of fungi**

118 Metal resistance ability of isolated fungal strains was determined by following the protocol  
119 of [14]. Pour plate method was selected for screening the resistant fungal strains against Cd, Cr,  
120 Cu, Hg, Pb and Zn. The ME agar medium was modified with different metal concentrations  
121 ranging from 10 – 1050 mg L<sup>-1</sup>. Fungal disc of 3 mm size with actively growing hyphae was cut  
122 aseptically from each isolate and cultured on ME agar plate followed by incubation at 25±3°C for  
123 7 days. After incubation, the growth of fungal strains on metal-containing and control plates was  
124 observed. The strains showing resistance at low metal concentration were exposed to higher  
125 concentrations and minimum inhibitory concentrations (MICs) of each strain against the metal  
126 was determined.

## 127 **7. Heavy metal resistance assay of bacteria**

128 Metal resistance potential of isolated strains was determined by following the method of  
129 [15]. Agar well diffusion technique was used for screening of metal-resistant bacterial strains  
130 against Cd, Cr, Cu, Hg, Pb and Zn. After incubation at 37°C for 24 h, the zone of inhibition was  
131 measured as an indicator of sensitivity. The strains showing resistance at low concentrations  
132 were further exposed to high concentrations and their sensitivity was measured.

## 133 **8. Metal biosorption potential of fungal strains**

134 Based on the metal resistance assay, five fungal strains having the maximum metal  
135 resistance potential were chosen for biosorption test. Biosorption efficiency of the selected  
136 resistant strains was observed at 500 mg L<sup>-1</sup> concentration (Pb, Cr, and Zn) and 200 mg L<sup>-1</sup> (Cd

137 and Cu). A disc of ME agar medium having actively growing mycelium of each fungus was cut  
138 aseptically and suspended into metal containing-ME broth medium. Flasks were incubated at  
139  $25\pm 3^{\circ}\text{C}$  on an orbital shaker set at 150 rpm for 7-10 days followed by filtration. The supernatant  
140 was digested in nitric acid and perchloric acid (3:1 ratio), followed by filtration (Whatman no. 42).  
141 The sample was diluted up to 50 mL with distilled water [16]. The total metal concentration was  
142 determined on an atomic absorption spectrophotometer and the biosorption efficiency (%) was  
143 calculated by the formula:

$$144 \quad \text{Biosorption efficiency (\%)} = \frac{C_i - C_e}{C_e} \times 100$$

145 Where,  $C_i$  represents initial concentration of metal in the solution and  $C_e$  represents final  
146 concentration of metal in the solution at equilibrium.

## 147 **9. Metal biosorption potential of resistant bacterial strains**

148 The ten strains having maximum metal resistance were selected and inoculated into LB  
149 broth medium followed by incubation at  $37^{\circ}\text{C}$  and 150 rpm until the O.D reached to 0.6 at 600 nm.  
150 Metal solution (Cd, Cr, Cu, Pb and Zn) of  $500 \text{ mg L}^{-1}$  concentration was added into each flask  
151 separately including control. Flasks were re-incubated at  $37^{\circ}\text{C}$  for 24 h followed by centrifugation  
152 at 5000 rpm for 15-20 min. The supernatant was collected and digested in double volume of  
153 concentrated nitric acid on a hot plate at  $100^{\circ}\text{C}$  until the volume reduced to half. The sample was  
154 filtered through filter paper (Whatman no. 42) and diluted up to 100 mL using distilled water. The  
155 reduction in total metal content was determined on an atomic absorption spectrophotometer and  
156 the metal biosorption capacity (%) was calculated following the method of [17].

## 157 **10. Molecular characterization of resistant fungal strains**

### 158 **a. DNA extraction**

159 DNA of the five resistant *Trichoderma* strains was extracted using CTAB method [18].  
160 Lyophilized fungal mycelia were homogenized in 2% CTAB extraction buffer followed by  
161 incubation at 65°C. After centrifugation, the supernatant was collected in a new microcentrifuge  
162 tube and 2 µL of RNase was added into the reaction mixture succeeded by incubation at 37°C for  
163 15 minutes. Next, purification step was carried out by adding an equal volume of phenol:  
164 chloroform: isoamyl alcohol (25:24:1) followed by centrifugation at 13000 rpm for 10 minutes.  
165 An equal volume of ice-cold isopropanol was mixed with the upper collected aqueous layer  
166 followed by incubation at –20°C for 30 minutes. After centrifugation, DNA pellet was washed  
167 with 500 µL of 70% ethanol succeeded by centrifugation at 12,000 rpm for 5 minutes. Ethanol was  
168 discarded, and DNA pellet was dried and dissolved in 50 µL of TE buffer for further use.

#### 169 **b. PCR amplification**

170 To carry out PCR reaction, 50 µL reaction mixture was prepared by adding 2 µL of  
171 template DNA (30-35 ng), 10 µL of 5x Phusion buffer, 1 µL of 10 mM dNTPs, 0.5 µL Taq  
172 polymerase, and 2.5 µL of 10 mM primer solutions i.e., forward ITS1F (5' -  
173 TCCGTAGGTGAACCTGCGG – 3') and reverse ITS4R (5' – TCCTCCGCTTATTGATATGC  
174 – 3') primers were used to amplify the ITS1 and ITS2 region. The PCR conditions were set with  
175 an initial denaturation at 98°C for one minute followed by annealing at 50.8°C for one minute and  
176 extension at 72°C for one minute. Final extension was performed at 72 °C for 10 minutes. The  
177 PCR products were visualized in 1% agarose gel (w/v) having 0.1 µg mL<sup>-1</sup> SYBR safe and  
178 visualized in gel-doc imaging software.

#### 179 **c. DNA Sequencing**

180 The PCR products were submitted to the Cornell Institute of Biotechnology for di-  
181 deoxy Sanger DNA sequencing and the obtained sequences were subjected to nucleotide BLAST



182 database via NCBI website (<http://www.ncbi.nlm.nih.gov>) to determine their homology. The  
183 sequences were submitted to NCBI GenBank and accession numbers were obtained. For sequence  
184 identification variation, all sequences were clustered by using Clustal Omega software  
185 (<http://www.ebi.ac.uk/>).

## 186 **11. Molecular characterization and DNA sequencing of resistant bacterial strains**

### 187 **a. DNA extraction**

188 DNA of ten resistant *Bacillus* strains was extracted using Thermo Scientific GeneJet  
189 genomic DNA purification kit.

### 190 **b. PCR amplification**

191 To perform PCR, 25  $\mu$ L reaction mixture was prepared by adding 1  $\mu$ L of template DNA  
192 (25-35 ng), 12.50  $\mu$ L of Phusion PCR master mix and 1.25  $\mu$ L of 10 $\mu$ M primer solutions i.e.,  
193 forward (5'- AGA GTT TGA TCC TGG CTC AG-3') and reverse primer (5'-GGT TAC CTT  
194 GTT ACG ACT T-3') were used to amplify the 16s rRNA region. The PCR conditions were set  
195 with an initial denaturation at 98°C for 30 s followed by 30 cycles (denaturation at 98°C for 10 s,  
196 annealing at 56°C for 30 s and extension at 72°C for 30 s). The final extension was performed at  
197 72 °C for 5 min. PCR products were run in 1 % (w/v) agarose gel with 0.1  $\mu$ g mL<sup>-1</sup> SYBR safe  
198 followed by bands visualization using gel-doc Imaging software.

### 199 **c. DNA Sequencing**

200 The PCR products were submitted to the Cornell Institute of Biotechnology for di-deoxy  
201 Sanger DNA sequencing. Percent homology of sequenced strains was checked using the nucleotide  
202 blast database through NCBI. The sequences were submitted to NCBI GenBank and accession  
203 numbers were obtained. For sequence identification variation, all sequences were clustered by  
204 using Clustal Omega software (<http://www.ebi.ac.uk/>).

## 205 **Results**

### 206 **1. Morphological characterization of fungal strains**

207 A total of twelve strains of fungi were isolated from TSW and were characterized up to  
208 genus level and some to the species level, based on colony morphology and microscopic  
209 characteristics (Table 1). Among the isolates, one strain belonged to *Alternaria*, three to  
210 *Aspergillus*, two to *Fusarium* and six to *Trichoderma*.

### 211 **2. Biochemical characterization of bacterial strains**

212 A total of twenty-five bacterial colonies were isolated from TSW. Morphological  
213 observations revealed that most of the strains to be rod shaped while only five were round (Table  
214 2). Strains TSW-3, TSW-4, TSW-7, TSW-19, and TSW-24 were gram-negative and all others  
215 were gram-positive. Except for TSW-6, TSW-7, TSW-10, TSW-18, TSW-20, and TSW-22, all  
216 remaining strains were catalase positive. Most of the strains showed positive results for the oxidase  
217 test except TSW-3, TSW-4, TSW-7, TSW-13, TSW-19, and TSW-24. Out of 25 bacterial strains,  
218 ten strains demonstrated positive results for MR test, while seven strains were found positive for  
219 the VP test. Based on the biochemical characteristics, the isolates were identified up to the genus  
220 level as *Micrococcus* spp., *Bacillus* spp., *Klebsiella* spp., *Escherichia* sp., *Pseudomonas* spp. and  
221 *Streptococcus* spp.

### 222 **3. Heavy metal resistance assay of fungal strains**

223 In the current study, twelve strains of filamentous fungi were isolated from the tannery  
224 solid waste. The maximum metal resistance potential of each was studied against six different  
225 metals by culturing them on metal-containing ME agar plates. The results showed that among  
226 twelve strains, TSWF-6 exhibited maximum resistance for Cd at 400 mg L<sup>-1</sup>; TSWF-4, TSWF-11  
227 for Cr at 800 mg L<sup>-1</sup>; TSWF-2, TSWF-3, TSWF-8, TSWF-11 for Cu at 450 mg L<sup>-1</sup>; TSWF-2,

228 TSWF- 6 for Hg at 100 mg L<sup>-1</sup>; TSWF-2, TSWF-5 for Pb at 1050 mg L<sup>-1</sup> and TSWF-10, TSWF-  
229 11 for Zn at 650 mg L<sup>-1</sup>. The MICs of the isolated strains for each metal was determined as shown  
230 in the form of a heatmap in Table 3. The resistance of isolated fungi to the studied metals was in  
231 the order of Pb> Cr> Zn > Cu > Cd > Hg. The behavior of metal-resistant strains for more than  
232 one metal in the form of venn diagram is also shown in Fig. 1

#### 233 **4. Heavy metal resistance assay for bacterial strains**

234 A good resistance against different metals was observed in most of the bacterial strains by  
235 zone inhibition plate assay. Diversified results were observed for isolated bacterial strains as  
236 shown in the heatmap (Table 4) along with the order of heavy metal resistance against six different  
237 metals. The results illustrated that among twenty-five strains, TSW-6, TSW-8, TSW-17 showed  
238 maximum resistance for Pb at 1200 mg L<sup>-1</sup>; TSW-2, TSW-14, TSW-15, TSW-21 for Cr at 950 mg  
239 L<sup>-1</sup>; TSW-4, TSW-9, TSW-16, TSW-20, TSW-25 for Cu at 650 mg L<sup>-1</sup>; TSW-5, TSW-10 for Cd  
240 at 600 mg L<sup>-1</sup>; TSW-4, TSW-19, TSW-22 for Zn at 700 mg L<sup>-1</sup> and TSW-3, TSW-5, TSW-17,  
241 TSW-19, TSW-21, TSW-24 for Hg at 50 mg L<sup>-1</sup>. The behavior of metal resistant strains for more  
242 than one metal is depicted in Fig. 2.

#### 243 **5. Metal biosorption potential of fungal strains**

244 Biosorption potential of five HM resistant strains against synthetic metal solutions are  
245 shown in Fig. 3A. The strain TSWF-10 exhibited 73.7% biosorption for Cr, TSWF-11 exhibited  
246 71.8 % for Cu whereas TSWF-3 showed biosorption potential of 81.7 % for Pb. In the current  
247 study, metal resistant strains selected for biosorption showed the maximum removal efficiency for  
248 Pb, Cr and Zn compared to Cu and Cd.

#### 249 **6. Metal biosorption potential of bacterial strains**

250           Among the twenty-five strains, TSW-06 and TSW-17 showed maximum biosorption  
251 potential for Pb i.e., 86.8 and 80.7 %, whereas, for Cr, 79.2, 89.8 and 74.3 % biosorption potential  
252 were exhibited by TSW-02, TSW-14, and TSW-15, respectively. For Zn, 87.5 and 80.7 %  
253 biosorption potential was revealed by TSW-19 and TSW-22 (Fig. 3B).

## 254 **7. Molecular characterization of fungal strains**

255           Based on metal resistant assay, five metal resistant *Trichoderma* strains were molecularly  
256 characterized by amplifying and sequencing ITS1 and ITS2 regions. The sequence analysis of ITS  
257 region revealed that all the five strains belonged to the genus *Trichoderma*. The accession numbers  
258 for sequenced *Trichoderma* strains were obtained by NCBI. The statistical analysis of the  
259 phylogenetic tree (MEGA Version 10.1.8), generated by bootstrapping (100) and maximum  
260 likelihood method showed the similarity index of all the studied sequenced strains with NCBI  
261 reported known species as displayed in Fig. 4. The isolated *Trichoderma* spp. were characterized  
262 as *Trichoderma lixii* (MW042868.1); *Trichoderma pseudokoningii* (MW042872.1); *Trichoderma*  
263 *pseudokoningii* (MW042876.1); *Trichoderma hamatum* (MW042877.1) and *Trichoderma*  
264 *harzianum* (MW042899.1).

## 265 **8. Multiple sequence alignments of sequenced fungal strains**

266           Clustal W analysis of DNA sequences of five fungi belonging to the genus *Trichoderma*  
267 was executed using bioinformatics tool i.e., Clustal Omega software. The results showed presence  
268 of more variation compared to conserved regions as shown in Fig. 5. It was observed that out of  
269 the total aligned sequences, 173 base pair long conserved region was observed among DNA  
270 sequences of characterized *Trichoderma* strains, symbolized by asterisk. The strains which had  
271 more matched base pairs were considered close to each other and vice versa. In the current study,  
272 TSWF-3 and TSWF-10 had more matched and less mismatched base pairs and both were identified

273 as *T. pseudokoningii*. Among all strains, more genetic variation was noted in *Trichoderma*  
274 *harzianum* followed by *Trichoderma hamatum* and the variation was represented by ‘grey  
275 highlighted area’ in the sequence (Fig. 5).

## 276 **9. Molecular characterization of selected bacterial strains**

277 The ten strains of bacteria exhibiting best metal resistance were molecularly identified  
278 using 16S rRNA ribotyping technique. The accession numbers for sequenced *Bacillus* strains were  
279 obtained by NCBI. Constructed dendrogram results distinguished those selected strains belonging  
280 to genus *Bacillus*. Statistical analysis of the constructed phylogenetic tree (MEGA Version 10.1.8),  
281 generated by the maximum likelihood method and bootstrapping (100) showed the similarity index  
282 of all the selected strains (Fig 6). The *Bacillus* species isolated in this study were identified as  
283 *Bacillus xiamenensis* (MT809704.1); *B. velezensis* (MT809705.1); *B. piscis* (MT809706.1); *B.*  
284 *safensis* (MT809709.1); *B. subtilis* (MT810012.1); *B. subtilis* (MT809752.1); *B. subtilis*  
285 (MT819963.1); *B. licheniformis* (MT812984.1); *B. cereus* (MT814215.1) and *B. thuringiensis*  
286 (MT814283.1). This is the first report of isolation of different *Bacillus* strains from tannery solid  
287 waste.

## 288 **10. Multiple sequence alignments of sequenced bacterial strains**

289 Clustal W analysis of DNA sequences of ten different metal-resistant bacterial strains  
290 belonging to the genus *Bacillus* was performed using Clustal Omega software. The results  
291 illustrated major ratio of varied region compared to conserved regions as exhibited in Fig. 7.  
292 Among the aligned sequences, 90 base pair long conserved region was observed among DNA  
293 sequences of characterized *Bacillus* strains, symbolized by asterisk. The strains which had more  
294 matched base pairs were deemed close to each other and vice versa. Our finding showed that TSW-  
295 14, TSW-15 and TSW-22 had more matched and less mismatched base pairs and all three were

296 named *Bacillus subtilis*. Among all strains, more genetic variation was observed in *B. thuringiensis*  
297 accompanied by *B. licheniformis* and the sequence with variation was denoted by ‘grey highlighted  
298 area’ in the sequence (Fig. 7).

## 299 **Discussion**

300 Being an industrial city, Kasur faces pollution problems due to the release of metals  
301 containing waste from leather industries that pose a threat to the environment, air, soil, human and  
302 plants. Tanning industries are considered the major source of metal contaminants, therefore,  
303 isolation of metal-resistant strains from such sites may play a vital role in the bioremediation of  
304 contaminated sites. Our results showed that among the strains isolated from TSW, one strain  
305 belonged to *Alternaria*, two to *Fusarium*, three to *Aspergillus* and six to *Trichoderma*.  
306 *Trichoderma* species have been widely reported from tannery solid waste [9], municipal solid  
307 waste [19], metal contaminated soil [20] and mining sites [21]. Numerous studies have shown that  
308 *Trichoderma* species resist a high concentration of metals and also improve plant growth under  
309 metal stressed environment [22]. The genera of fungi isolated from TSW in the present study have  
310 already been observed at metal-contaminated sites. On the contrary, in the current study,  
311 biochemical identification results showed that isolated bacterial strains were identified as  
312 *Escherichia* (1 spp.), *Streptococcus* (2 spp.), *Pseudomonas* (4 spp.), *Micrococcus* (3 spp.),  
313 *Klebsiella* (2 spp.) and *Bacillus* (13 spp.). These results come as no surprise because these genera  
314 are the most cultivatable ones. Similar results were demonstrated by [23], who isolated  
315 *Pseudomonas* spp., *Bacillus* spp., and *Alcaligenes* spp. from leather dye.

316 In our study, metal resistant potential of twelve fungal isolates against six different metals  
317 i.e., Cd, Cr, Cu, Hg, Pb and Zn were assessed, but *Trichoderma* and *Aspergillus niger* showed  
318 maximum resistance against the different metals. Several filamentous fungal genera like

319 *Aspergillus*, *Fusarium*, *Trichoderma*, *Humicola* and *Nannizzia* have been reported as metal  
320 resistant genera [24]. Increase in metal concentration caused a decrease in fungal growth. The  
321 decrease in fungal biomass may appear to be due to high metal concentration and particular MIC  
322 of isolated strains. [24] reported that fungal resistance to toxic metals may be attributed to the  
323 presence of an effective resistance mechanism. The maximum resistance was observed against Cr  
324 and Pb over others. Various resistance mechanisms adopted by fungi for remediation of  
325 contaminants include adsorption, oxidation, reduction, methylation, and detoxification. Analogous  
326 to our findings [21] reported that *Trichoderma*, *Rhizopus* and *Fomitopsis* isolated from gold  
327 mining sites could resist 400-1000 mg kg<sup>-1</sup> Pb, Cu, Fe and 25 mg kg<sup>-1</sup> Cd. [25] reported that  
328 *Trichoderma* spp. have the maximum tolerance level against Cd, Cr, Cu, Ni, Pb and Zn. Our study  
329 has shown that fungi isolated from TSW have a good resistance against all HMs.

330 In current study, metal resistant potential of twenty-five bacterial isolates against six  
331 different metals i.e., Cd, Cr, Cu, Hg, Pb and Zn were evaluated, but diversified strains of *Bacillus*  
332 showed maximum resistance at high concentration of different metals. The bacterial growth at high  
333 metal concentrations appears to be due to the presence of an effective resistance mechanism for  
334 metal detoxification such as metal efflux, intracellular sequestration, binding with bacterial cell  
335 envelopes, and metal reduction. Our findings demonstrated that isolated strains showed maximum  
336 resistance potential against Pb and Cr over others. Some of the important bacterial genera used in  
337 the remediation of metal-contaminated sites are *Bacillus*, *Pseudomonas*, *Acinetobacter* and  
338 *Enterococcus* [26]. High metal concentration may lead to a decrease in the growth and biochemical  
339 activities of strains, whereas resistant strains have the potential to reproduce at high concentrations.

340 Fungi and bacteria have a better biosorption potential because of the nature of their cell  
341 wall and the functional groups involved in metal binding. Biosorption is described as the

342 elimination of particulates, compounds and metals from a solution by using economical living  
343 materials. In the current findings, metal resistant *Trichoderma* strains showed maximum removal  
344 efficiency for Pb, Cr and Zn compared to Cu and Cd. Comparable results have been shown by  
345 [27], that a high level of Cr could be remediated by applying *Trichoderma* spp. According to [28],  
346 among various functional groups, amine and carboxylate groups are important binding sites for  
347 metal attachment and biosorption in fungi. However, the success of metal biosorption by fungi  
348 depends on the type and concentration of metal, physiological and environmental conditions,  
349 availability of nutrients and fungal species [28]. Researchers have reported that fungal strains such  
350 as *A. niger*, *A. terreus*, *Trichoderma harzianum* and *Rhizopus oryzae* survive in high metal  
351 concentrations [29]. Similarly, [30] have shown that *Rhizopus* and *Trichoderma* spp. could resist  
352 high concentration of Pb, Cr and Cd. In fact, the presence of *Trichoderma* in highly toxic metal  
353 laden environments, already documented by many researchers, has been confirmed in the present  
354 study. The fungal strains TSWF-3, TSWF-10 and TSWF-11 showed multi-metal resistance and  
355 biosorption and can therefore be employed to clean media contaminated with metals, may be water  
356 or soil.

357 In our study, metal resistant *Bacillus* spp. showed high biosorption for Pb, Cr, and Zn  
358 compared to Cu and Cd at 500 mg L<sup>-1</sup>. The reason for high Pb sorption may be attributed to high  
359 atomic weight compared to others, which makes it to interact readily with biological components.  
360 [31] stated that chromium-resistant strains have the potential to biosorb Cr in the living system  
361 either by binding it on the cell wall surface or precipitating it with anions or polymers secreted by  
362 bacteria. In the current study, the reason for better biosorption potential of Cr and Zn could be due  
363 to the availability of anionic functional groups on bacterial surfaces. The gram-negative strains  
364 exhibited better resistance and biosorption for Pb and Zn compared to Cr, Cu and Cd. It is



365 worthwhile to mention that none of the bacterial strains showed multi-metal biosorption, rather  
366 individual strains showed affinity for particular metals.

367 Kingdom fungi is considered the second largest eukaryotic group, ranging from 1.5 - 5.1  
368 million species on earth. Mycologists have encountered the problem of identifying and classifying  
369 the wide genera of fungi from a taxonomic perspective. For species-level identification, the ITS  
370 regions are considered the fastest and useful part of the rRNA cistron. Over three decades ago,  
371 fungal nuclear ribosomal operon primers were used for molecular identification of fungi [32]  
372 which helped to generate the sequence of smaller subunit i.e., nrSSU-18S, larger subunit i.e.,  
373 nrLSU-26S or 28S and Internal Transcribed Spacer (ITS) region i.e., ITS1, 5.8S, ITS2.  
374 [33] reported that the maximum likelihood of correct fungal identification could be achieved by  
375 sequencing ITS regions. Compared to conventional methods, PCR and Sanger sequencing have  
376 been overwhelmingly used for fungal ITS i.e., ITS1, ITS2 and 5.8S. In the current study, five metal  
377 resistant *Trichoderma* strains were molecularly characterized by amplifying and sequencing ITS1  
378 and ITS2 regions as given by [34]. The sequence analysis of ITS region revealed that all the five  
379 fungal strains belonged to the genus *Trichoderma*. Analogous to our findings, *Trichoderma* species  
380 have been widely reported from tannery effluent, municipal solid waste [19], mining sites [21] and  
381 metal contaminated soil [20]. Numerous studies reported that *Trichoderma* species have the  
382 potential to resist a high concentration of metals and increase plant growth [22]. To best of our  
383 knowledge, this is the first report of isolation of different *Trichoderma* strains from tannery solid  
384 waste.

385 Multiple sequence alignment (MSA) is defined as a bioinformatics-based tool for sequence  
386 alignment of three or more DNA, RNA, or protein sequences to identify variation. In the current  
387 study, maximum intraspecific variation was observed among strains of the same genus i.e.,

388 *Trichoderma*. In the current study, more genetic variation was displayed by *T. hamatum* and *T.*  
389 *harzianum*. The possible reasons for these genetic variations could be due to accessibility of metal  
390 stress environments to microbes. [35] stated that environmental stress may lead to a high molecular  
391 diversity and genetic variability. In the current study, the possible reason for genetic variation  
392 seems to be metal stress in the environment.

393 The ten strains of bacteria exhibiting best metal resistance were molecularly identified  
394 using 16S rRNA ribotyping technique. The sequence analysis of the 16S rRNA gene revealed that  
395 all the ten strains belong to the genus i.e., *Bacillus*. The *Bacillus* species were widely reported  
396 from municipal solid waste [36], municipal wastewater [37], polluted soil [38], coastal  
397 environment, tannery effluent [39]. This is the first report of isolation of different *Bacillus* strains  
398 from tannery solid waste.

399 In the current study, multiple sequence alignment results illustrated that *B. subtilis* (TSW-  
400 14), *B. subtilis* (TSW-15) and *B. subtilis* (TSW-22) had more matched and less mismatched base  
401 pairs. Among all strains, more genetic variation was observed in *B. thuringiensis* followed by *B.*  
402 *licheniformis* and the sequence with variation was represented by ‘grey highlighted area’ in the  
403 sequence. The possible reasons for these genetic variations may be attributed to attainability of  
404 metal stress environments to microbes.

## 405 **Conclusion**

406 Autochthonous microbes isolated from HM polluted environment have the potential to  
407 grow and survive in such environment. A variety of filamentous fungi and bacteria isolated from  
408 TSW indicated five species of *Trichoderma* and ten of *Bacillus* with a good tolerance and  
409 biosorption potential for metals. Molecular characterization indicated the fungi to be *T. hamatum*,  
410 *T. harzianum*, *T. lixii*, and two strains of *T. pseudokoningii*. On the other hand, the ten bacterial

411 strains were found to be *B. xiamenensis*, *B. velezensis*, *B. piscis*, *B. safensis*, *B. licheniformis*, *B.*  
412 *cereus*, *B. thuringiensis* and three strains of *B. subtilis*. The fungal strains *T. psuedokoningii* (TSW-  
413 3, TSW-10) and *T. harzianum* showed a multi-metal tolerance and resistance. Bacteria exhibited  
414 metal- specific tolerance and resistance, *Bacillus xiamenensis*, *B. subtilis* (TSW-14) and *B. subtilis*  
415 (TSW-15) against Cr, *B. safensis* against Cu, *B. piscis*<sup>T</sup> and *B. subtilis* (TSW-17) against Pb and  
416 *B. licheniformis* and *B. thuringiensis* against Zn. Thus, the efficient microbial flora can be  
417 employed in removing metals from contaminated soil and water.

418

#### 419 **Funding**

420 The travel grant was provided by Higher Education Commission (HEC) Pakistan through  
421 IRSIP programme to Ms. Hajira Younas (HEC/IRSIP/2020) for visiting Cornell University,  
422 Ithaca, New York.

#### 423 **Acknowledgements**

424 The authors acknowledge the Kasur tannery waste management agency (KTMWA),  
425 Depalpur road, Kasur for providing sample for microbial study. We are grateful to HEC Pakistan  
426 for providing funding to carry out this research in Cornell University, Ithaca, New York.

#### 427 **Conflict of interests**

428 The authors declare that they have no conflict of interests.

429

#### 430 **References**

- 431 1. Carrillo-González R, González-Chávez MD. Tolerance to and accumulation of cadmium  
432 by the mycelium of the fungi *Scleroderma citrinum* and *Pisolithus tinctorius*. Biological  
433 Trace Element Research. 2012; 146(3):388-95.

- 434 2. Kotaś J, Stasicka ZJ. Chromium occurrence in the environment and methods of its  
435 speciation. *Environmental Pollution*. 2000; 107(3):263-83.
- 436 3. Ahirwar NK, Gupta G, Singh R, Singh V. Isolation, identification and characterization of  
437 heavy metal resistant bacteria from industrial affected soil in central India. *International*  
438 *Journal of Pure Applied Biosciences*. 2016; 4(6):88-93.
- 439 4. Yin K, Wang Q, Lv M, Chen L. Microorganism remediation strategies towards heavy  
440 metals. *Chemical Engineering Journal*. 2019; 360:1553-63.
- 441 5. Wang J, Chen C. Biosorbents for heavy metals removal and their future. *Biotechnology*  
442 *advances*. 2009; 27(2):195-226.
- 443 6. Krishnamoorthy G, Leus IV, Weeks JW, Wolloscheck D, Rybenkov VV, Zgurskaya HI.  
444 Synergy between active efflux and outer membrane diffusion defines rules of antibiotic  
445 permeation into Gram-negative bacteria. *MBio*. 2017; 8(5):e01172-17.
- 446 7. Dotaniya ML, Panwar NR, Meena VD, Dotaniya CK, Regar KL, Lata M, Saha JK.  
447 Bioremediation of metal contaminated soil for sustainable crop production. In *Role of*  
448 *rhizospheric microbes in soil*. Springer, Singapore; 2018; 143-173.
- 449 8. Yan C, Wang F, Geng H, Liu H, Pu S, Tian Z, Chen H, Zhou B, Yuan R, Yao J. Integrating  
450 high-throughput sequencing and metagenome analysis to reveal the characteristic and  
451 resistance mechanism of microbial community in metal contaminated sediments. *Science*  
452 *of The Total Environment*. 2020; 707:136116.
- 453 9. Bareen F, Nazir A. Metal decontamination of tannery solid waste using *Tagetes patula* in  
454 association with saprobic and mycorrhizal fungi. *The Environmentalist*. 2010; 30(1):45-  
455 53.

- 456 10. Bareen F, Shafiq M, Jamil S. Role of plant growth regulators and a saprobic fungus in  
457 enhancement of metal phytoextraction potential and stress alleviation in pearl millet.  
458 Journal of Hazardous Materials. 2012; 237:186-93.
- 459 11. Samson RA, Visagie CM, Houbraeken J, Hong SB, Hubka V, Klaassen CH, Perrone G,  
460 Seifert KA, Susca A, Tanney JB, Varga J. Phylogeny, identification and nomenclature of  
461 the genus *Aspergillus*. Studies in Mycology. 2014; 78:141-73.
- 462 12. Pitt JI, Hocking AD. Fungi and food spoilage. New York, Springer; 2009.
- 463 13. Cappuccino J, Sherman N. Microbiology. A laboratory manual. Pearson Education; 2014.
- 464 14. Acosta-Rodríguez I, Cárdenas-González JF, Rodríguez Pérez AS, Oviedo JT, Martínez-  
465 Juárez VM. Bioremoval of different heavy metals by the resistant fungal strain *Aspergillus*  
466 *niger*. Bioinorganic Chemistry & Applications. 2018.
- 467 15. Hassen A, Saidi N, Cherif M, Boudabous A. Resistance of environmental bacteria to heavy  
468 metals. Bioresource Technology. 1998; 64(1):7-15.
- 469 16. Javaid A, Bajwa R, Javaid A. Biosorption of heavy metals using a dead macro fungus  
470 *Schizophyllum commune* fries: evaluation of equilibrium and kinetic models. Pakistan  
471 Journal of Botany. 2010; 42(3):2105-18.
- 472 17. Marzan LW, Hossain M, Mina SA, Akter Y, Chowdhury AM. Isolation and biochemical  
473 characterization of heavy-metal resistant bacteria from tannery effluent in Chittagong city,  
474 Bangladesh: Bioremediation viewpoint. The Egyptian Journal of Aquatic Research. 2017;  
475 43(1):65-74.
- 476 18. Aamir S, Sutar S, Singh SK, Baghela A. A rapid and efficient method of fungal genomic  
477 DNA extraction, suitable for PCR based molecular methods. Plant Pathology &  
478 Quarantine. 2015; 5(2):74-81.

- 479 19. Gautam SP, Bundela PS, Pandey AK, Awasthi MK, Sarsaiya S. Diversity of cellulolytic  
480 microbes and the biodegradation of municipal solid waste by a potential strain.  
481 International Journal of Microbiology. 2012; 2012.
- 482 20. Kacprzak MJ, Rosikon K, Fijalkowski K, Grobelak A. The effect of Trichoderma on heavy  
483 metal mobility and uptake by *Miscanthus giganteus*, *Salix* sp., *Phalaris arundinacea*, and  
484 *Panicum virgatum*. Applied & Environmental Soil Science. 2014.
- 485 21. Oladipo OG, Awotoye OO, Olayinka A, Bezuidenhout CC, Maboeta MS. Heavy metal  
486 tolerance traits of filamentous fungi isolated from gold and gemstone mining sites.  
487 Brazilian Journal of Microbiology. 2018; 49:29-37.
- 488 22. Zhang D, Yin C, Abbas N, Mao Z, Zhang Y. Multiple heavy metal tolerance and removal  
489 by an earthworm gut fungus *Trichoderma brevicompactum* QYCD-6. Scientific Reports.  
490 2020; 10(1):1-9.
- 491 23. Khan MR, Manchur MA, Mahmud N, Fatama B. Isolation and identification of bacterial  
492 strains from tannery effluent and its capability assessment to degrade leather dye. Journal  
493 of Pollution Effects & Control. 2019; 7:235.
- 494 24. Iram S, Zaman A, Iqbal Z, Shabbir R. Heavy metal tolerance of fungus isolated from soil  
495 contaminated with sewage and industrial wastewater. Polish Journal of Environmental  
496 Studies. 2013; 22(3).
- 497 25. Mohammadian E, Ahari AB, Arzanlou M, Oustan S, Khazaei SH. Tolerance to heavy  
498 metals in filamentous fungi isolated from contaminated mining soils in the Zanjan  
499 Province, Iran. Chemosphere. 2017; 185:290-6.

- 500 26. Nath S, Paul P, Roy R, Bhattacharjee S, Deb B. Isolation and identification of metal-  
501 tolerant and antibiotic-resistant bacteria from soil samples of Cachar district of Assam,  
502 India. *SN Applied Sciences*. 2019; 1(7):1-9.
- 503 27. Kapahi M, Sachdeva S. Bioremediation options for heavy metal pollution. *Journal of*  
504 *Health & Pollution*. 2019; 9(24).
- 505 28. Kumar V, Dwivedi SK. Hexavalent chromium stress response, reduction capability and  
506 bioremediation potential of *Trichoderma* sp. isolated from electroplating wastewater.  
507 *Ecotoxicology & Environmental Safety*. 2019; 185:109734.
- 508 29. Mishra A, Malik A. Metal and dye removal using fungal consortium from mixed waste  
509 stream: optimization and validation. *Ecological Engineering*. 2014; 69:226-31.
- 510 30. Liaquat F, Munis MF, Haroon U, Arif S, Saqib S, Zaman W, Khan AR, Shi J, Che S, Liu  
511 Q. Evaluation of Metal Tolerance of Fungal Strains Isolated from Contaminated Mining  
512 Soil of Nanjing, China. *Biology*. 2020; 9(12):469.
- 513 31. Thatheyus AJ, Ramya D. Biosorption of chromium using bacteria: an overview. *Science*  
514 *International*. 2016; 4(2):74-9.
- 515 32. White TJ, Bruns T, Lee SJ, Taylor J. Amplification and direct sequencing of fungal  
516 ribosomal RNA genes for phylogenetics. *PCR protocols: a guide to methods and*  
517 *applications*. 1990; 18(1):315-22.
- 518 33. Schoch CL, Seifert KA, Huhndorf S, Robert V, Spouge JL, Levesque CA, Chen W.  
519 Nuclear ribosomal internal transcribed spacer (ITS) region as a universal DNA barcode  
520 marker for Fungi. *Proceedings of National Academy of Sciences*. 2012; 109:6241-6246.

- 521 34. Oskiera M, Szczech M, Bartoszewski G. Molecular identification of *Trichoderma* strains  
522 collected to develop plant growth-promoting and biocontrol agents. *Journal of*  
523 *Horticultural Research*. 2015; 23(1).
- 524 35. Nevo E. Selection overrides gene flow at “Evolution Canyons”, Israel. *Advances in*  
525 *Genetics*. 2011; 5(3):67-89.
- 526 36. Sareen SJ, Thomas S, Sruthy AJ. Molecular characterization of microorganisms in  
527 municipal solid waste for production of industrial enzymes and enhanced biodegradation.  
528 *Biotechnol Resources*. 2018; 4:80.
- 529 37. Sonune N, Garode A. Isolation, characterization and identification of extracellular enzyme  
530 producer *Bacillus licheniformis* from municipal wastewater and evaluation of their  
531 biodegradability. *Biotechnology Research & Innovation*. 2018; 2(1):37-44.
- 532 38. Avşar C, Koyuncu H, Aras ES. Isolation and molecular characterization of *Bacillus* spp.  
533 isolated from soil for production of industrial enzymes. *Biological & Chemical Research*.  
534 2017; 3(9):72-86.
- 535 39. Sujatha P, Kumar BN, Kalarani V. Isolation, characterization and molecular identification  
536 of bacteria from tannery effluent using 16S rRNA sequencing. *Current Biotica*. 2012;  
537 6(2):198-207.



1 preprint doi: <https://doi.org/10.1101/2021.11.12.468455>; this version posted November 12, 2021. The copyright holder for this preprint (which was not certified by peer review) is the author/funder. This article is a US Government work. It is not subject to copyright under 17 USC 105 and is also made available for use under a CC0 license.

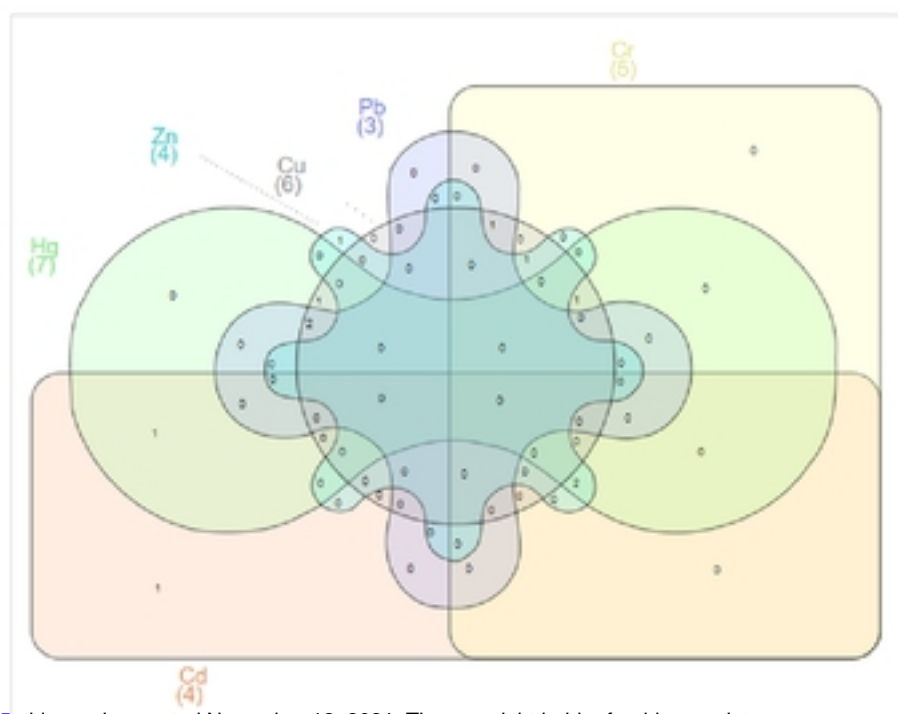

2 **Fig 1.** Venn diagram showing the behavior of metal resistant filamentous fungal strains against  
3 the heavy metals Cd, Cr, Cu, Hg, Pb and Zn. Among the isolated fungal strains (n=12), 4 Cd  
4 resistant (300-400 mg L<sup>-1</sup>), 5 Cr resistant (700-800 mg L<sup>-1</sup>), 6 Cu resistant (350-450 mg L<sup>-1</sup>), 7 Hg  
5 resistant (50-100 mg L<sup>-1</sup>), 3 Pb resistant (950-1050 mg L<sup>-1</sup>) and 4 Zn resistant (550-650 mg L<sup>-1</sup>)  
6 strains have been arranged in a Venn diagram.

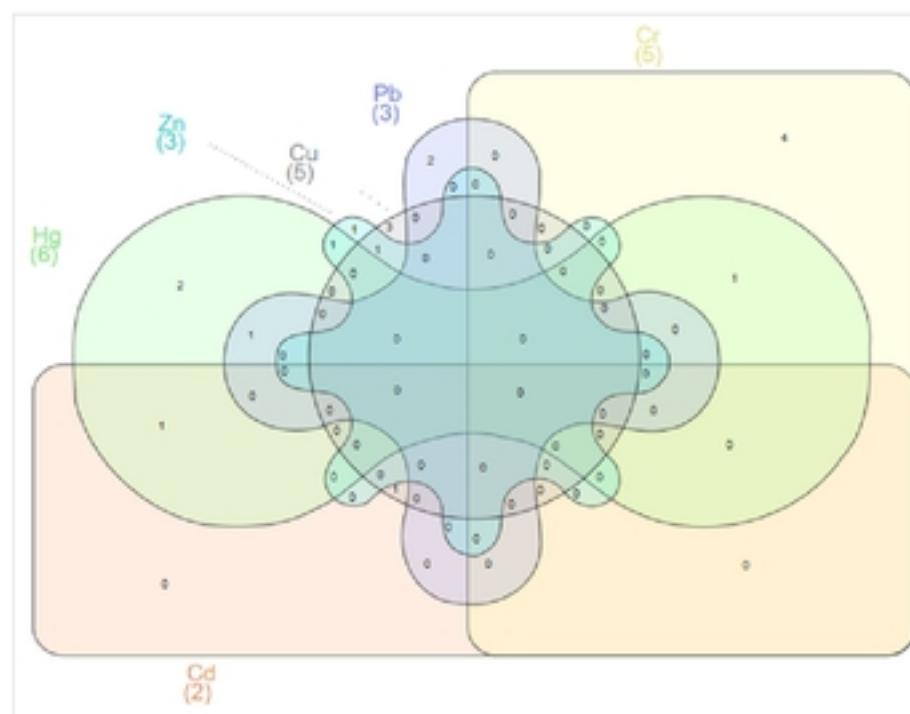

7  
8 **Fig 2.** Venn diagram showing the behavior of metal resistant bacterial strains against the heavy  
9 metals Cd, Cr, Cu, Hg, Pb and Zn. Among the isolated bacterial strains (n=25), 2 Cd resistant (600  
10 mg L<sup>-1</sup>), 5 Cr resistant (950 mg L<sup>-1</sup>), 5 Cu resistant (650 mg L<sup>-1</sup>), 6 Hg resistant (50 mg L<sup>-1</sup>), 3 Pb

11 resistant (1200 mg L<sup>-1</sup>) and 3 Zn resistant (700 mg L<sup>-1</sup>) strains have been arranged in a Venn  
12 diagram.

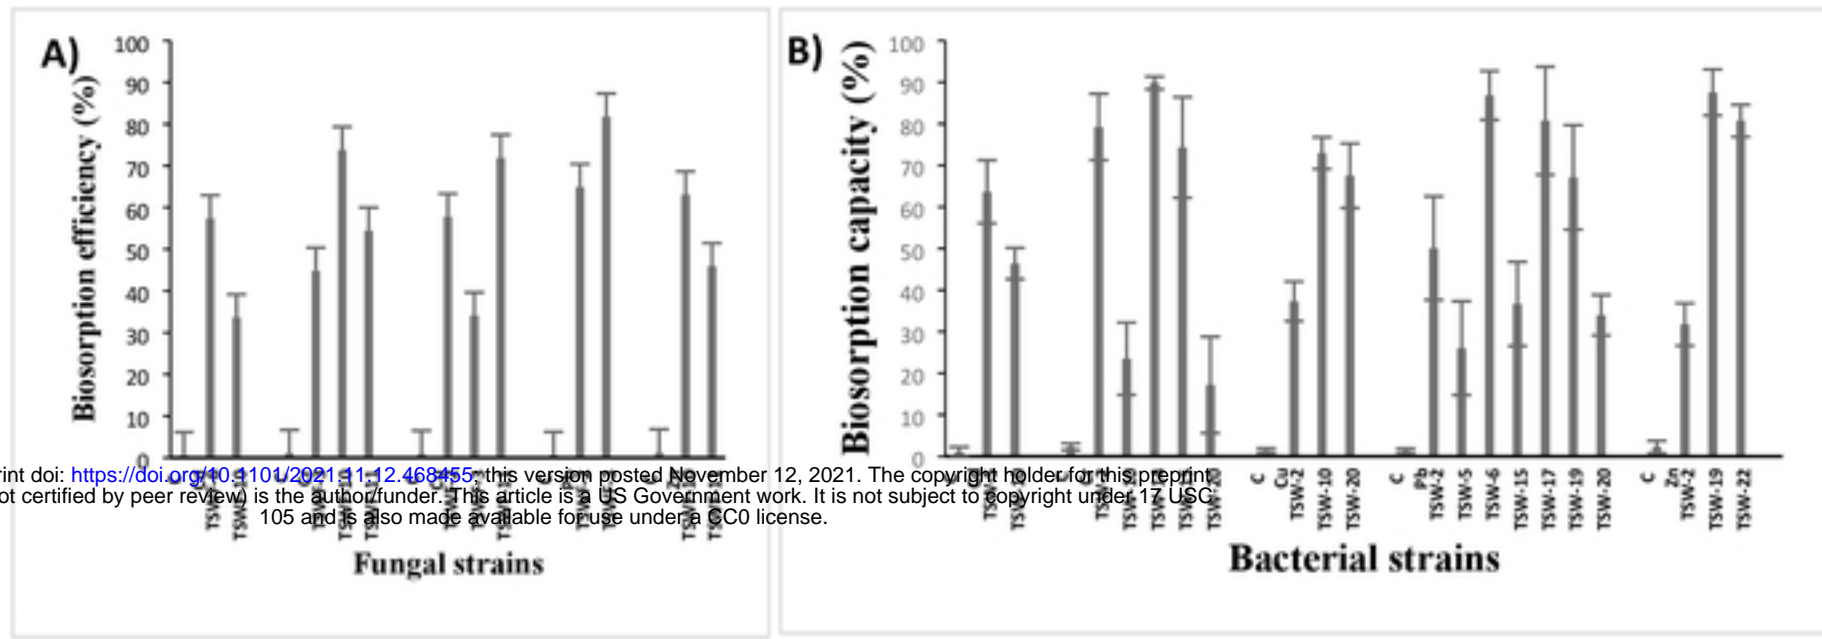

13  
14 **Fig. 3.** Biosorption efficiency (%) of selected resistant fungal and bacterial strains. **A.** Bar graph  
15 of resistant fungal strains against their respective metal concentrations, at 200 mg L<sup>-1</sup> (Cd and  
16 Cu) and 500 mg L<sup>-1</sup> (Cr, Pb and Zn) concentrations **B.** Bar graph of resistant bacterial strains at  
17 500 mg L<sup>-1</sup> concentration of metals.

bioRxiv preprint doi: <https://doi.org/10.1101/2021.11.12.468455>; this version posted November 12, 2021. The copyright holder for this preprint (which was not certified by peer review) is the author/funder. This article is a US Government work. It is not subject to copyright under 17 USC 105 and is also made available for use under a CC0 license.

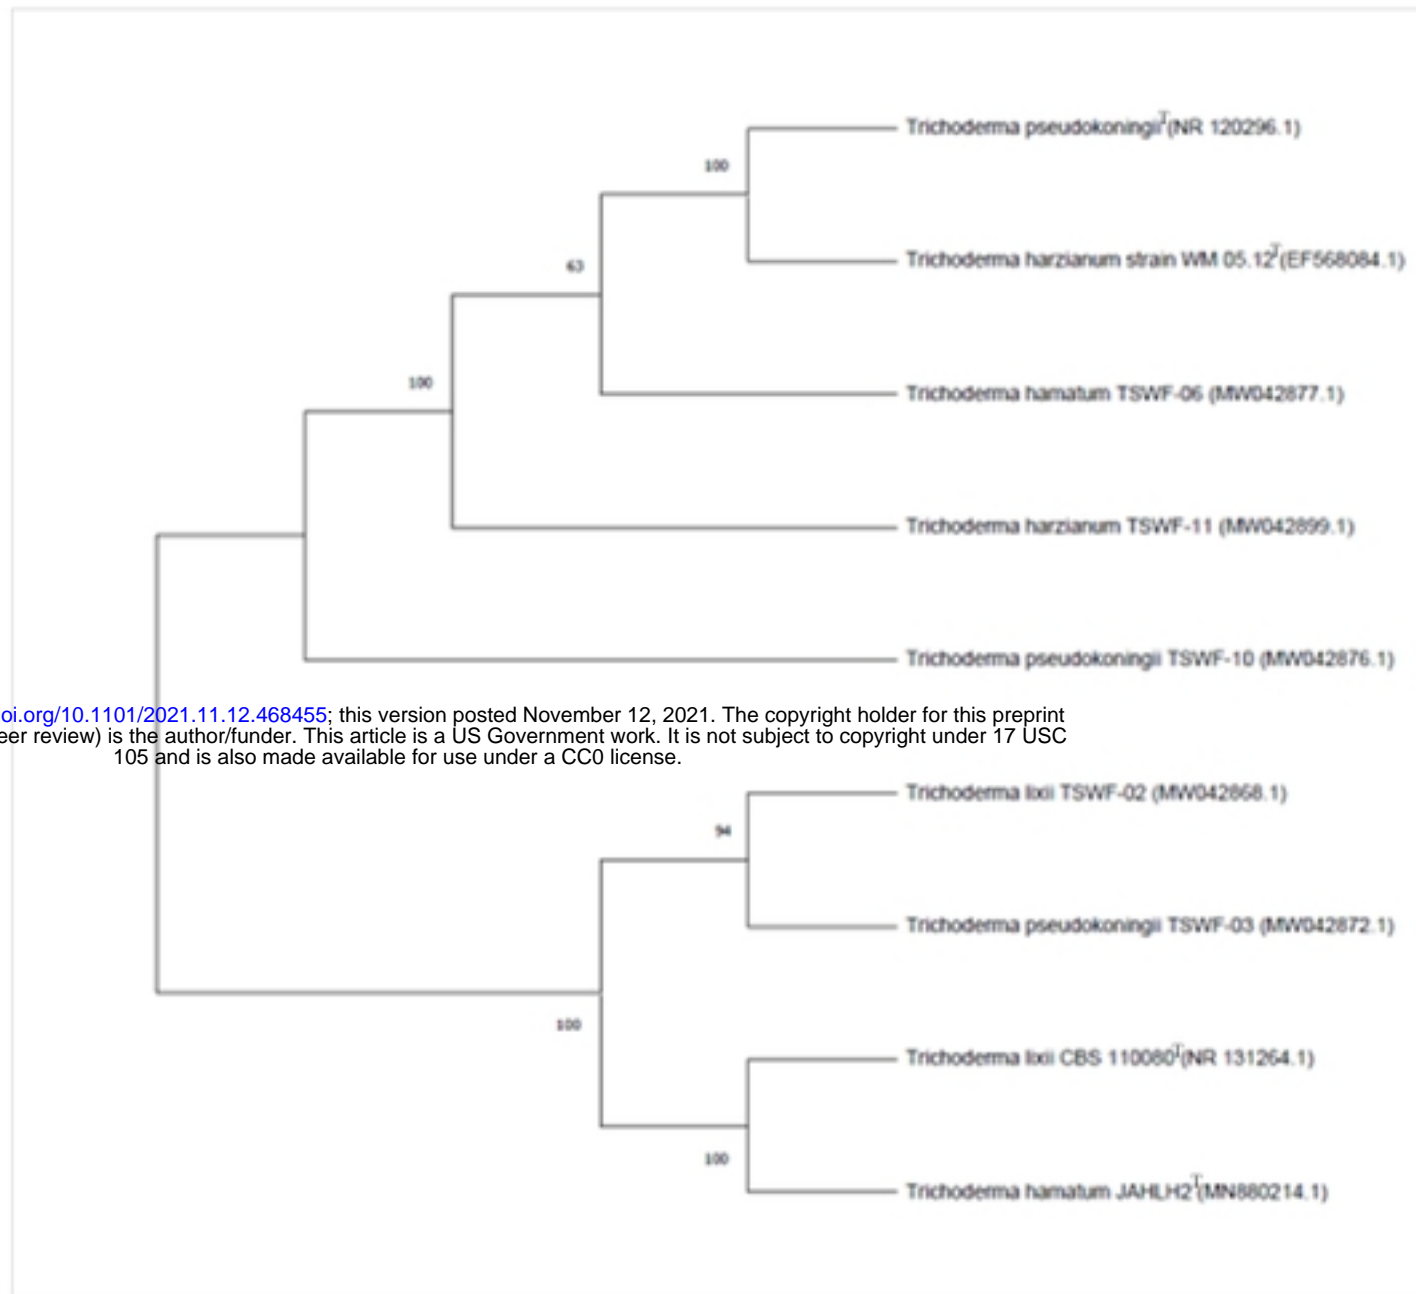

18

19

**Fig 4.** Phylogenetic relationship of five metal resistant *Trichoderma* strains

|         |                                                               |    |
|---------|---------------------------------------------------------------|----|
| TSWF-11 | -----                                                         | 0  |
| TSWF-02 | -----GTTGGTAAACCAGCGGAGAGGGATCATTACCGA                        | 33 |
| TSWF-06 | ATCAAGTAAAAAATCGTAACAAGGTCTCCGGCCTTGAACCAGCGGAGGGATCATTACCGA  | 60 |
| TSWF-03 | -AGCTAGTAAAAGTCGTAACAAGGTCTCCGTT--GGTGAACCAGCGGAGGTTCATTACCGA | 57 |
| TSWF-10 | -----AAGGGTTGGTTG--GTGACCAGCGGAGGGATCATTACCGA                 | 38 |

|         |                                                                |     |
|---------|----------------------------------------------------------------|-----|
| TSWF-11 | -----                                                          | 0   |
| TSWF-02 | GTTTACAA----CTCCCAAACCCAATGTGAACGTTACCAAACCTGTTGCCTCGGC GGGATC | 89  |
| TSWF-06 | GTTTACAA----CTCCCAAACCCAATGTGAACGTTACCAAACCTGTTGCCGGCGGGGTAC   | 116 |
| TSWF-03 | GTTTACAA--CTCCTCAAACCCAATGTGAACGTTACCAATCTGTTGCCTCGGC GGGATC   | 115 |
| TSWF-10 | GTTTACAACCCTTCCCAAACCCAATGTGAACGTTACCAATCTGTTGCCTCGGC GGGATC   | 98  |

|         |                                                               |     |
|---------|---------------------------------------------------------------|-----|
| TSWF-11 | -----                                                         | 0   |
| TSWF-02 | TC--TGCCCCGGGTGCGTCGCAGCCCCGGACCA--AGGCGCCCGCCGGAGGACCAACCTA  | 145 |
| TSWF-06 | GC-----CCCGGGTGCCTAAAAGCCCCGGAACC--AGGCGCCCGCCGGAGGAACCAACCAA | 169 |
| TSWF-03 | TC--TGCCCCGGGTGCGTCGCAGCCCCGGACCA--AGGCGCCCGCCGGAGGACCAAAAAC  | 173 |
| TSWF-10 | -----GCCCCGGATCCCATGGCGCCCGCCGGAGGACCAACCAA                   | 158 |

bioRxiv preprint doi: <https://doi.org/10.1101/2021.11.12.468455>; this version posted November 12, 2021. The copyright holder for this preprint (which was not certified by peer review) is the author/funder. This article is a US Government work. It is not subject to copyright under 17 USC 105 and is also made available for use under a CC0 license.

|         |                                                            |     |
|---------|------------------------------------------------------------|-----|
| TSWF-11 | -----                                                      | 0   |
| TSWF-02 | AAACTCTTATGTATACCCCTCGCGG-----GTTTTTTTATAA-TCTGA           | 188 |
| TSWF-06 | ACTCTTTCTGT--AGTCCCCTCGCGG-----A                           | 194 |
| TSWF-03 | TCTCCTTTTT--CTCTCCGTGCGGGCCTACGTGCGGGCTCTGTTTTATTTGCTCTGAG | 231 |
| TSWF-10 | ACTCTTTTCT---CTCCGTGCGGGCTCCGTGCGGGCTCTGTTTTATTTTCTGCTGAG  | 214 |

|         |                                                              |     |
|---------|--------------------------------------------------------------|-----|
| TSWF-11 | -----AC                                                      | 2   |
| TSWF-02 | GCCTTCTCGGCGCCTCTCGTAGGCGTTTCGAAAATGAATCAAACCTTTCAACAACGGATC | 248 |
| TSWF-06 | CGTATTTCTTACAGCTCTGAGCAAAAATTCAAAATGAATCAAACCTTTCAACAACGG--- | 251 |
| TSWF-03 | CCTTTCTCGGCGACCCTAGCGGGCGTCTCGAAAATGAATAAACTTTCAACAACGGATAC  | 291 |
| TSWF-10 | CCTTTCTCGGCGACCCTAGCGGGCGTCTCGAAAATGAATCAAACCTTTCAACAACGGA-- | 272 |

20

|         |                                                                |     |
|---------|----------------------------------------------------------------|-----|
| TSWF-11 | GGACTTGGTCTGGCATCGATGAAGAACG---CAGCGAAATGCGTAAGTAATGTGAATTG    | 59  |
| TSWF-02 | TCTTG---GTTCTCATCGATGAAGAACG---CAGCGAAATGCGATAAGTAATGTGAATTG   | 302 |
| TSWF-06 | ATCTCTTGTCTGGCATCGATGAAGAACG---CAGCGAAATGCGATAAGTAATGTGAATTG   | 309 |
| TSWF-03 | ACTCTTGGTCTGGCATCGATGAAGAACG---CAGCGAAATGCGATAAGTAATGTGAATTG   | 349 |
| TSWF-10 | TCTCTTGGTCTGGCATCGATGAAGAACG---CAGCGAGGAATGCGATAAGTAATGTGAATTG | 332 |
|         | * ***** ** *****                                               |     |

|         |                                                              |     |
|---------|--------------------------------------------------------------|-----|
| TSWF-11 | CAGAATTCAGTGAATCATCGAATCTTTGAACGCACATTGCGCCCGC--CAGTCTGGCGG  | 117 |
| TSWF-02 | CAGAATTCAGTGA-ACATCGAATCTTTGAACGCACATTGCGCCCGCAGTATTCTGGCGG  | 361 |
| TSWF-06 | CAGAATTCAGTGAATCATCGAATCTTTGAACGCACATTGCGCCCGCAGTATTCTGGCGG  | 369 |
| TSWF-03 | CAGAATTCAGTGAATCATCGACTTCTTTGAACGCACATTGCGCCCGCAGTATTCTGGCGG | 409 |
| TSWF-10 | CAAATTCAGTGAATCATCGAATCTTTGAACGCACATC--GCCCGCAGTATTCTGGCGG   | 390 |
|         | ** ***** * ***** *****                                       |     |

|         |                                                              |     |
|---------|--------------------------------------------------------------|-----|
| TSWF-11 | GCATGCCTGTCCGAGCGTCATTTCAACCCTCGAACCCTCCGGGGGGTTCGGCGTTGGGGA | 177 |
| TSWF-02 | GCATGCCTGTCCGAGCGTCATTTCAACCCTCGAACCCTCCGGGGGGTTCGGCGTTGGGGA | 421 |
| TSWF-06 | GCATGCCTGTCCGAGCGTCATCAACCCTCGAACCCTCCGGGGGATCGGCGTTGGGGAT-  | 428 |
| TSWF-03 | GCATGCCTGTCCGAGCGTCATTTCAACCCTCGAACCCTCCGGGGGGTTCGGTTGGGGATC | 469 |
| TSWF-10 | GCATGCCTGTCCGAGCGTCATTTCAACCCTCGAACCCTCCGGGGGGTTCGGCGTTGGGGG | 450 |
|         | ***** * * ** * **                                            |     |

|         |                                                               |     |
|---------|---------------------------------------------------------------|-----|
| TSWF-11 | TCGGCCCTGCCTTGG---CGGTGGCCGTCTCCGAAATACAGTGGCGGTCTCGCCGAGCC   | 234 |
| TSWF-02 | TCGGCCCTGCCTTGG---GCTGTGGCCGTCTCCGAAATACAGTGGCGGTCTCGCCG--CAG | 475 |
| TSWF-06 | -----CGGGACCCCTCACCGGGTGCCGGCCCTGAAATACAGTGGCGGTCTCGCCG--CAG  | 481 |
| TSWF-03 | GGCCCTC-----ACCGGGCCGCCCGAAATCCAGTGGCGGTCTCGCCG--CAG          | 517 |
| TSWF-10 | GGGAACCGGCCCTTTCACCGGGGCCGCCCGAAATCCAGTGGCGGTCTCGC--ACG       | 508 |
|         | * **** * * ** *                                               |     |

21

|         |                                                               |     |
|---------|---------------------------------------------------------------|-----|
| TSWF-11 | TCTGCCCTGCGCAGTAGTTTGCACACTCGCATCGGGAGCGCGGCGCGTCCACAGCCGTTA  | 294 |
| TSWF-02 | CCTCTCCTGCGCAGTAGTTTGCACACTCGCATCGGGAGCGCGGCGTCCA--CAGCCGTTA  | 533 |
| TSWF-06 | CCTCTCCTGCGCAGTAGTTTGCACAACCTCGCACCGGGAGC-GCGGCGTCCACGTCCGTAA | 540 |
| TSWF-03 | CCTCTCCTGCGCAGTAGTTTGCACACTCGCACCGGGAGCGCGGCGCGGCCACAGCCGTTA  | 577 |
| TSWF-10 | CCTCTCCTGCGCAGTATTTTGCACACTCGCACCGGGAGCGCGGCGCGGCCACAGCCGTTA  | 568 |
|         | ** ***** ***** * ** * * * **** *                              |     |
| TSWF-11 | AACACCCAACT-----TCTGATGTTGACCTCGGATCAGGTAGGAATACCCGCTGAACTT   | 348 |
| TSWF-02 | AACACCC---AACTTCTGAAATGTTGACCTCGGATCAGGTAGGAATACCCGCTGAACTT   | 589 |
| TSWF-06 | AACACCC-AACTTCTGAAACGGATGTGACCTCGGATCGTAC-----                | 580 |
| TSWF-03 | AACACCCCAAACCTCTGAAAGTTGT-TGACCTCGGATCAGG-----                | 616 |
| TSWF-10 | AACACCCCAAACCTCTGCTGAAATGTTGACCTCGGATCAGGTAGGAATACCCGCTGAACTT | 628 |
|         | ***** *****                                                   |     |
| TSWF-11 | AAGCATATCATAAGGCCGGGAGGAAATTTCCGAGGTTACGACTCCGGAACCGAGGGGAAA  | 408 |
| TSWF-02 | AACGTAGCATA-----                                              | 600 |
| TSWF-06 | -----                                                         | 580 |
| TSWF-03 | -----                                                         | 616 |
| TSWF-10 | -----                                                         | 634 |

bioRxiv preprint doi: <https://doi.org/10.1101/2021.11.12.468455>; this version posted November 12, 2021. The copyright holder for this preprint (which was not certified by peer review) is the author/funder. This article is a US Government work. It is not subject to copyright under 17 USC 105 and is also made available for use under a CC0 license.

22

23 **Fig. 5.** Multiple Sequence Alignment of different metal resistant *Trichoderma* strains showing  
 24 conserved sequences with asterisks, and genetic variations with grey highlights.

bioRxiv preprint doi: <https://doi.org/10.1101/2021.11.12.468455>; this version posted November 12, 2021. The copyright holder for this preprint (which was not certified by peer review) is the author/funder. This article is a US Government work. It is not subject to copyright under 17 USC 105 and is also made available for use under a CC0 license.

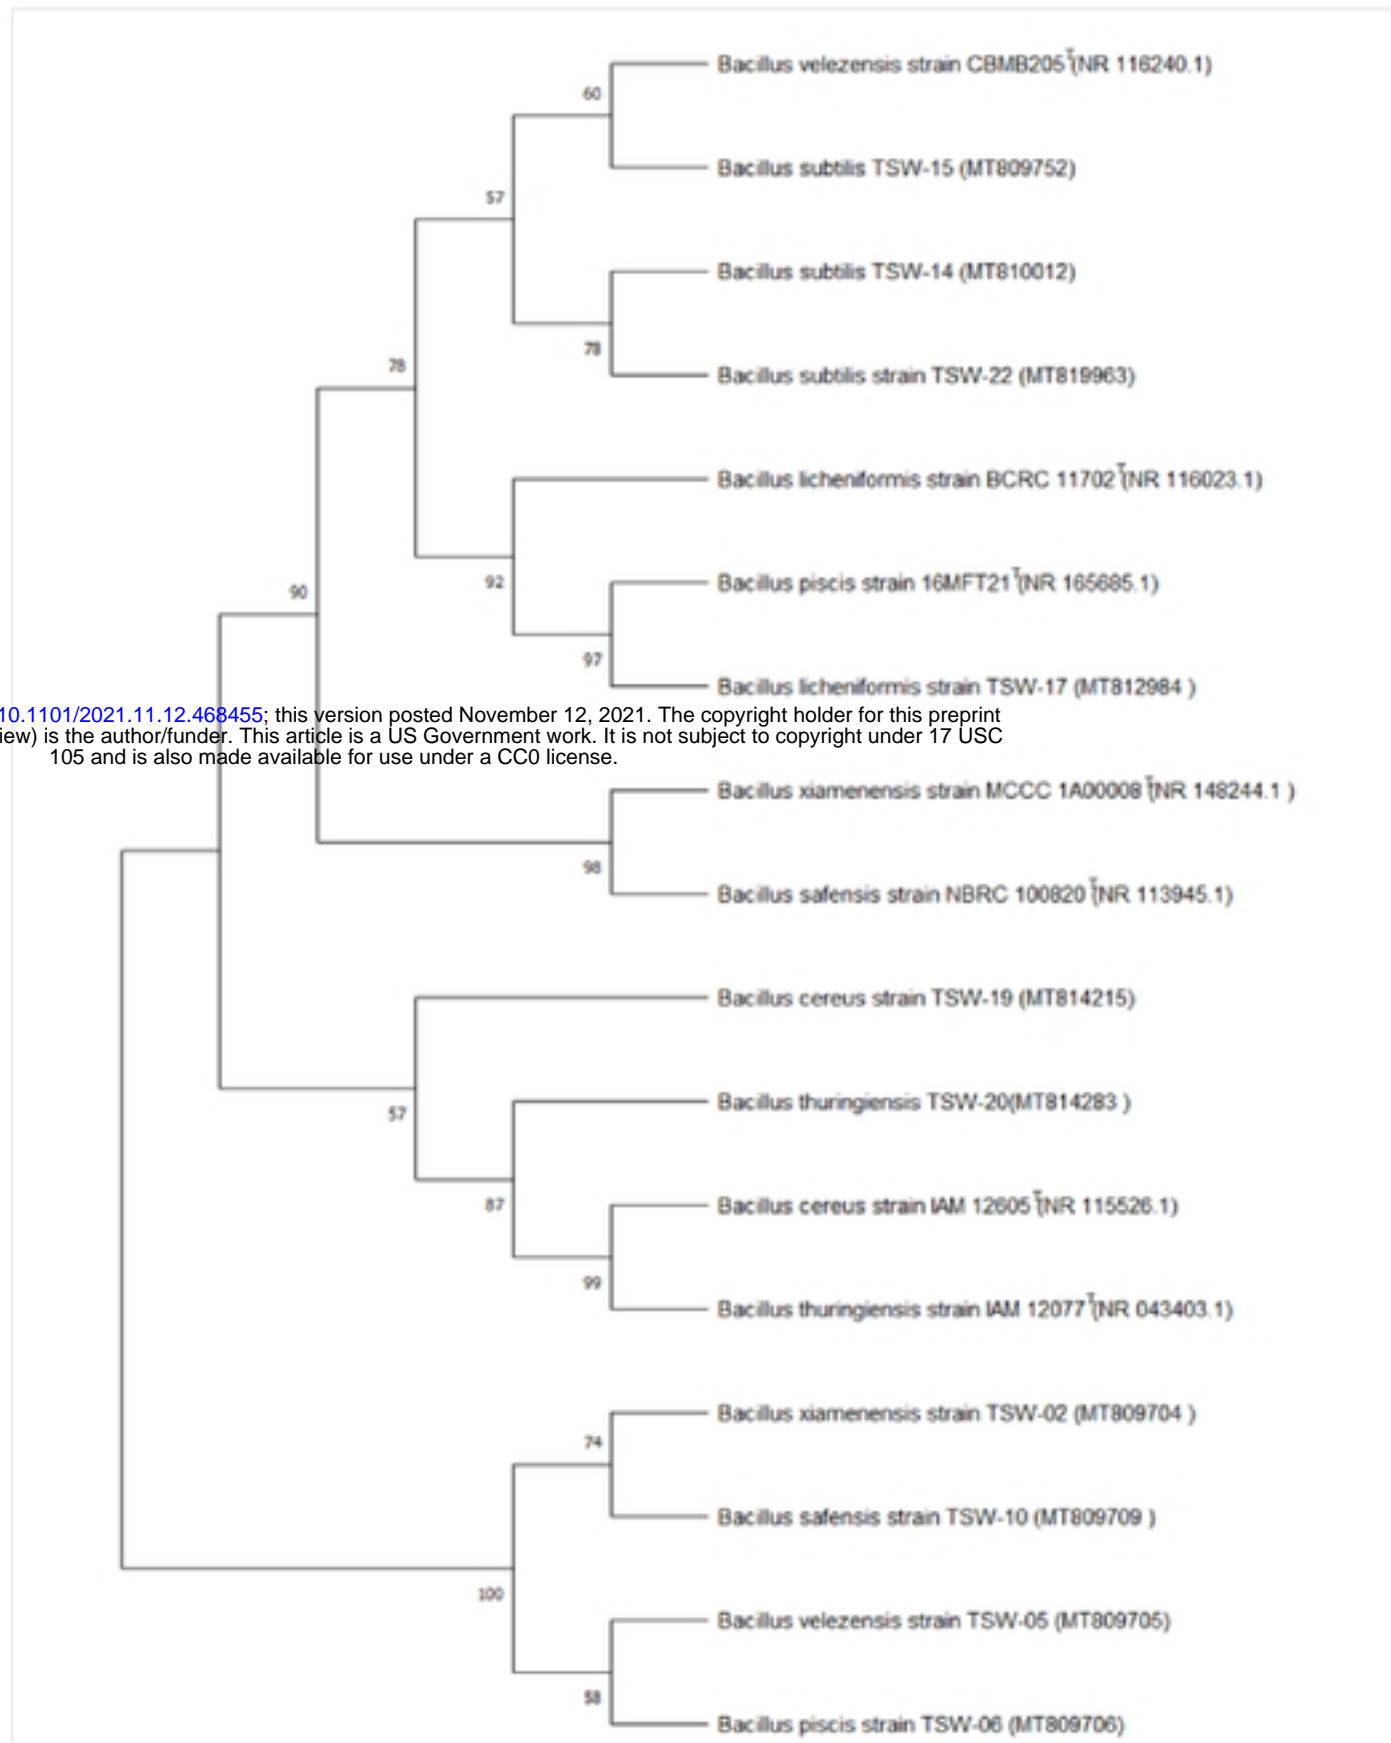

25

26

**Fig 6.** Phylogenetic relationship of ten metal resistant *Bacillus* strains

bioRxiv preprint doi: <https://doi.org/10.1101/2021.11.12.468455>; this version posted November 12, 2021. The copyright holder for this preprint (which was not certified by peer review) is the author/funder. This article is a US Government work. It is not subject to copyright under 17 USC 105 and is also made available for use under a CC0 license.

|        |                                                               |     |
|--------|---------------------------------------------------------------|-----|
| TSW-10 | ----ATAAAGGTTACCGTCACCGAC-----                                | 21  |
| TSW-06 | ---GGTCAAAGGTTACCTCACCGAC-----                                | 22  |
| TSW-02 | GCTCCATAAAGGTTACCTCACCGAC-----                                | 30  |
| TSW-05 | GTCTTAAAAGGTTACCGTCACCGAC-----                                | 42  |
| TSW-14 | -----                                                         | 0   |
| TSW-19 | GAAATTGAAAGGCGGCTTCGGC--TGTCACCTTATGG--ATGGACCCGCGTCGCATTAGCT | 230 |
| TSW-17 | ACCAAGGCGACGATGCGTAGCCGACCTGAGAGGGTGATCGGCCACACTGGGACTGAGACA  | 67  |
| TSW-15 | ACCAAGGCAACGATGCGTAGCCGACCTGAGAGGGTGATCGGCCACACTGGTACTGAGACA  | 141 |
| TSW-20 | CCCAAGGCAACGATGCGTAGCCGACCTGAGAGGGTGATCGGCCACACTGGGACTGAGACA  | 228 |
| TSW-22 | ACCAAGGCAACGATGCGTAGCCGACCTGAGAGGGTGATCGGCCACACTGGGACTGAGACA  | 150 |

|        |                                                             |     |
|--------|-------------------------------------------------------------|-----|
| TSW-10 | -----                                                       | 21  |
| TSW-06 | -----                                                       | 22  |
| TSW-02 | -----                                                       | 30  |
| TSW-05 | -----                                                       | 42  |
| TSW-14 | -----                                                       | 28  |
| TSW-19 | -----CAACGGGGGTTGAGTGATGACAGTGGTA                           | 290 |
| TSW-17 | CGGCCAGACTTACGGGAGG--CAGCAGTAGGGA---TCTCGCAATGGACGAAAGTCTG- | 121 |
| TSW-15 | CGGCCATACTCCTACGGTAGGCAGCACTAGGGAATCTTCCGTAATGGACAAAAGTCTGA | 201 |
| TSW-20 | CGGCCAGACTCCTACGGGAGGCAGCAGTAGGGAATCTTCCGCAATGGAGGAAAG-TCTG | 287 |
| TSW-22 | CGGCCAGACTCCTACGGGAGGCAGCAGTAGGGAATCTTCCGCAATGGACGAAAGTTCTG | 210 |

|        |                                                               |     |
|--------|---------------------------------------------------------------|-----|
| TSW-10 | -----TTCGGGTGTGCAAACGTCTCGTGGTGTG                             | 50  |
| TSW-06 | -----TTCGGGTGTACAAACTCTCGTGGTGTGA                             | 51  |
| TSW-02 | -----TTCGGGTGTGCAAACGTCTCGTGGTGTGA                            | 59  |
| TSW-05 | -----TTCGGGTGTACAAACTCTCGTGGTGTGA                             | 71  |
| TSW-14 | GAATGCAGACTGCGATCCGAGTGAGAAGGTTTTCGGAT--CGTAAAGCTCTGTTGTTAGG  | 86  |
| TSW-19 | -CGGAGCAACGCCGCGTGAGTGAAAG--GCTTTTCGGGTCG--TAAACTCTGTTGTTAGG  | 345 |
| TSW-17 | -ACGGAGCACGCCGCGTGAGTGATGAAGGTTTTCG-GATCGTAAACTCTGTTGTTAGG    | 179 |
| TSW-15 | CTCAATCAACTCCGCGTGAGTGATGAAGGTTTTCGGATCGTAAAGCTCTGTTGT---TAG- | 257 |
| TSW-20 | ACGGAGCAACGCCGCGTGAGTGATGAAGGCTTTCGGGTCG--TAAACTCTGTTGTTAGG   | 345 |
| TSW-22 | ACGGAGCAACGCCGCGTGAGTGATGAAGGTTTTCGGATCGCTTAAAGCTCTGTTGTTAGG  | 270 |

\*\* \*

|        |                                                              |     |
|--------|--------------------------------------------------------------|-----|
| TSW-10 | ACGGG--CGGTGT-----GTACA---GGCCCGGGAACGTATTAC-----            | 85  |
| TSW-06 | CGGGC--GGT-GT-----GTACAAGGCCCGGTAACGATATTAC-----             | 88  |
| TSW-02 | CG-GG--CGGTGT-----GTACAA--GGCCCGGGAACGTATTAC-----            | 94  |
| TSW-05 | CGGAG--CGGTGT-----GTACAA--GGCCCGGGAACGTATTAC-----            | 107 |
| TSW-14 | GAAGAACGCTTAAGTGCCGTTTCAATAGGGCGGTACCTTACGGTACCTAACCAGAAAGCC | 146 |
| TSW-19 | CAA----GTCACAAGTG-CATGATGAATACTGGCACCCACGCTTCTAACCAGTGAGC    | 400 |
| TSW-17 | GAA----GAACAAGTACCGTTTCAATAGGGCGGTACCTTACGGTACCTAACCAGAAAAG  | 235 |
| TSW-15 | -GG----AAGAAAGTACCGTTTCAATAGGGCGGTACCTTACGGTACCTAACCAGAA-AG  | 311 |
| TSW-20 | GAA----GAACAAGTGCTAGTTGAATAAGCTGGCACCTTACGGTAAAACCAGAAAAG-CC | 400 |
| TSW-22 | GAA----GAACAAGTACCGTTTCAATAGGGCGGTACCTTACGGTACCTAACCAGAA-AG  | 325 |

\*

|        |                                                              |     |
|--------|--------------------------------------------------------------|-----|
| TSW-10 | -----CGC-----GGCATGCTGATCCGCGATT                             | 107 |
| TSW-06 | -----CGC-----GGCATGCATGATCCGCGATT                            | 111 |
| TSW-02 | -----CGC-----GGCATGCATGATCCGCGATT                            | 117 |
| TSW-05 | -----CGC-----GGCATGCATGATCCGCGATT                            | 130 |
| TSW-14 | ACGGCTAACTACGTGCCAGCAGCCGCGGTAATACGTAGGTGGCAAGCGTTGTCCGGAATT | 206 |
| TSW-19 | CACGGCTAACTAGTGCCAGCAGCCGCGGTAATACGTAGGGG-CAAGCGTTATCCGGAATT | 459 |
| TSW-17 | CCACGGCTCTACGTGCCAGCAGCCGCGGTAATACGTAGGTGGCAAGCGTTGTCCGGAATT | 295 |
| TSW-15 | CCACGGCTAAC-----GCCAGCCGCGGTAATACGTAGGTGGCAAGCGTTGTCCGGAATT  | 365 |
| TSW-20 | ACGGCTAACTACGTGCCAGCAGCCGCGGTAATACGTAGGTGGC-AAGGTTATCCGGAATT | 459 |
| TSW-22 | CCACGGCTAACTACGTGCCAGCCGCGGTAATACGTAGGTGGC--AAGTTGTCCGGAATT  | 383 |

\* \* \*\*\*\* \*\*

bioRxiv preprint doi: <https://doi.org/10.1101/2021.11.12.468455>; this version posted November 12, 2021. The copyright holder for this preprint (which was not certified by peer review) is the author/funder. This article is a US Government work. It is not subject to copyright under 17 USC 105 and is also made available for use under a CC0 license.

|        |                                                                        |     |
|--------|------------------------------------------------------------------------|-----|
| TSW-10 | ACTAGC-----                                                            | 113 |
| TSW-06 | ACTAGC-----                                                            | 117 |
| TSW-02 | ACTAGC-----                                                            | 123 |
| TSW-05 | ACTAGC-----                                                            | 136 |
| TSW-14 | ATTGGGCGTAAAGGGCTCGCAGGCGGTTTCTAA-----GTCTGATGTGAAAGCCCCCGG            | 260 |
| TSW-19 | ATTGGGCGTAAAGCGCGCAGGTTTCTTAAGTCTGATGTGGTAAAAAGCCCCACGG                | 519 |
| TSW-17 | ATTGGGCGTAAAGCGCGCAGGCGGT---TTCTTAA----GTCTGATGTGAAAGCCCCCGG           | 348 |
| TSW-15 | ATTGGGCGTAAAGGGCTCGCAGGCGGTTTCTTAA----GTCTGATGTGAAAGCCCCCGG            | 421 |
| TSW-20 | ATTGGGCGTAAAGCGCGCAGGTTTCT--TA----AGTCGATGTGAAAACCCACGG                | 513 |
| TSW-22 | ATTGGGCGTAAAGGGCTCGCAGGCGGTTTCT--TA----AGTCTTGAAAGCCCCCGGCT            | 437 |
|        | * * *                                                                  |     |
| TSW-10 | -----GATTCCAGCTTCACGCAGG-CGAGTTGCAG                                    | 142 |
| TSW-06 | -----GATTCCAGCTTCACGCAGT-CGAGTTGCAG                                    | 146 |
| TSW-02 | -----GATTCCAGCTTCACGCAGTGCAGTTGCAG                                     | 153 |
| TSW-05 | -----GATTCCAGCTTCACGCAGTGCAGTTGCAG                                     | 166 |
| TSW-14 | CTCAACCGGGGAGGGTCATTGGAAACTGGGGAAGTTGAGTGCAGAAGAGGAGAG--GGAGAGTG--GA   | 316 |
| TSW-19 | CTCAACCGGGGAGGGTCATTGGAAACTGGGGAAGTTGAGTGCAGAAGAGGAGAG--GAAAGTG--GA    | 574 |
| TSW-17 | CTCAACCGGGGAGGGTCATTGGAAACTGGGGAAGTTGAGTGCAGAAGAGGAGAG---TGGAAAT       | 404 |
| TSW-15 | CTCAACCGGGGAGGGTCATTGGAAACTGGGGAAGTTGAGTGCAGAAGAGGAGAGTGGAAAT          | 481 |
| TSW-20 | CTCAACCGTGTGGGTCATTGGAAACTGGGATACTTGAAGTGCAGAAGAGGAAAGTGGAAAT          | 573 |
| TSW-22 | CTTAACCGGGGAGGGTCATTGGAAACTGGGGAAGTTGAGTGCAGAAGAGGAGAGTGGAAAC          | 497 |
|        | *                                                                      |     |
| TSW-10 | ACTGCGATCCGAACTGAGAACAGATTTATGGGATTGGCTAAACCTTGCG--TCTTGCAGC           | 200 |
| TSW-06 | ACTGCGATCCGAACTGAGAACAGATTTGTGGGATTGGCTTAGCCTCGCGG-CTTCGCTGC           | 205 |
| TSW-02 | ACTGCGATCCGAACTGAGAACAGATTTGTGGGATTGGCTAAACCTTGCGG-TCTCGCAGC           | 212 |
| TSW-05 | ACTGCGATCCGAACTGAGAACAGATTTGTGGGATTGGCTTAACCTCGCGG-TTTCGCTGC           | 225 |
| TSW-14 | ATTCCACGTGTAGCGGTGAAATGCGTAGAGATGTGGAGGAACACCAGTGGCGAAGGCGAC           | 376 |
| TSW-19 | ATTCCATGTGTAGCGGTGAAATGCGTAGAGATATGGAGGAACACCAGTGGCGAAG-CGAC           | 633 |
| TSW-17 | TC--CACGTGTAGCGGTGAAATGCGTAGAGATGTGGAGGAACACCAGTGGCGAAGGCGAC           | 461 |
| TSW-15 | TCTCCACGTGTAGCGGTGAAATGCGTAGAGATGTGGAGGAACACCAGTGGCGAAGGCGAC           | 541 |
| TSW-20 | ----TCCATGTGCGCGGTGAAATGCGTAGAGATATGGAGGAACACA-GTGGCGAAGGCGAC          | 628 |
| TSW-22 | ----CACGTGTAGCGGTGAAATGCGTAGAGATGTGGAGGAACACCAGTGGCGAAGGCGAC           | 553 |
|        | * ** * * * * *                                                         |     |
| TSW-10 | CCTTTGTTCTGTCCATTGTA-----GCACGTGTGTAGCCAGGTCATAAGG                     | 246 |
| TSW-06 | CCTTTGTTCTGTCCATTGTA-----GCACGTGTGTAGCCAGGTCATAAGG                     | 251 |
| TSW-02 | CCTTTGTTCTGTCCATTGTA-----GCACGTGTGTAGCCAGGTCATAAGG                     | 258 |
| TSW-05 | CCTTTGTTCTGTCCATTGTA-----GCACGTGTGTAGCCAGGTCATAAGG                     | 271 |
| TSW-14 | TCTCTGGTCTGTAAGTACCTGAGGA----GCGAAAGCGTGGGGAGCGAACAGGATTAGA            | 432 |
| TSW-19 | TTTCTGGTCTGTAAGTACCTGAGGCGGAAAGCGTGGGGAGCGAACAGGATTAGA                 | 688 |
| TSW-17 | TCTCTGGTCTGTAAGTACCTGAGGCGGAAAGCGTGGGGAGCGAACAGGATTAGA                 | 521 |
| TSW-15 | TCTCTGGTCTGTAAGTACCTGAGGCGGAAAGCGTGGGGAGCGAACAGGATTAGA                 | 598 |
| TSW-20 | TTTCTGGTCTGTAAGTACCTGAGGCGGAAAGCGTGGGGAGCGAACAGGATTAGA                 | 685 |
| TSW-22 | TCTCTGGTCTGTAAGTACCTGAGGCGGAAAGCGTGGGGAGCGAACAGGATTAGA                 | 610 |
|        | * ** *** ***** * ** * ** *                                             |     |
| TSW-10 | GGCATGATGATTTGACGTCAT---CCCCACCTTCTCCGTTTGTACCCGGCAGTCACCT             | 302 |
| TSW-06 | GGCATGATGATTTGACGTCAT---CCCCACCTTCTCCGTTTGTACCCGGCAGTCACCT             | 308 |
| TSW-02 | GGCATGATGATTTGACGTCAT---CCCCACCTTCTCCGTTTGTACCCGGCAGTCACCT             | 315 |
| TSW-05 | GGCATGATGATTTGACGTCAT---CCCCACCTTCTCCGTTTGTACCCGGCAGTCACCT             | 328 |
| TSW-14 | TACCCAATGGTAGTCCACGCGTAAACGAGAGTGCTAAGTGTAGGGGGTTTCCGC---CC            | 489 |
| TSW-19 | TACCCTGGTAGTCCACGCGTAAACGAGAGTGCTAAGTGTAGGGGGTTTCCGCG---GCCCTC         | 747 |
| TSW-17 | TACCCTGGTAGTCCACGCGTAAACGAGAGTGCTAAGTGTAGGGGGTTTCCGCG---GAGGGTTTCCGCCC | 573 |
| TSW-15 | TACCCTGGTAGTCCACGCGTAAACGAGAGTGCTAAGTGTAGGGGGTTTCCGCG---GCCCTC         | 658 |
| TSW-20 | TACCCTGGTAGTCCACGCGTAAACGAGAGTGCTAAGTGTAGGGGGTTTCCGCG---GCCCTC         | 740 |
| TSW-22 | TACCCTGGTAGTCCACGCGTAAACGAGAGTGCTAAGTGTAGGGGGTTTCCGCG---GCCCTC         | 667 |
|        | * *                                                                    |     |



bioRxiv preprint doi: <https://doi.org/10.1101/2021.11.12.468455>; this version posted November 12, 2021. The copyright holder for this preprint (which was not certified by peer review) is the author/funder. This article is a US Government work. It is not subject to copyright under 17 USC 105 and is also made available for use under a CC0 license.

|        |                                                                  |     |
|--------|------------------------------------------------------------------|-----|
| TSW-10 | TAGAGTGCCCA-----ACTGAATGCTGGCAACTAAGATCAAGGGT                    | 342 |
| TSW-06 | TAGAGTGCCCA-----ACTGAATGCTGGCAACTAAGATCAAGGGT                    | 348 |
| TSW-02 | TAGAGTGCCC-----ACTGAATGCTGGCAACTAAGATCAAGGGT                     | 354 |
| TSW-05 | TAGAGTGCCCA-----ACTGAATGCTGGCAACTAAGATCAAGGGT                    | 368 |
| TSW-14 | CTTAGTGCTGCAGCTAACGCATTAGGAAGAATGTCAGTTTTAATACGTTGCAACAGCCG-     | 548 |
| TSW-19 | CTTAGTGCTGA-----                                                 | 758 |
| TSW-17 | TTTAGTGCTGC-----                                                 | 584 |
| TSW-15 | CTTAGTGCTGC-----                                                 | 669 |
| TSW-20 | CTTAGTGCGAA-----                                                 | 751 |
| TSW-22 | CTTAGTGCTGC-----                                                 | 678 |
|        | *****                                                            |     |
| TSW-10 | TGCGCTCGTTGCGGGACTTAACCCAACATCTCACGACACGAGCTGACGACAACCATGCAC     | 402 |
| TSW-06 | TGCGCTCGTTGCGGGACTTAACCCAACATCTCACGACACGAGCTGACGACAACCATGCAC     | 408 |
| TSW-02 | TGCGCTCGTTGCGGGACTTAACCCAACATCTCACGACACGAGCTGACGACAACCATGCAC     | 414 |
| TSW-05 | TGCGCTCGTTGCGGGACTTAACCCAACATCTCACGACACGAGCTGACGACAACCATGCAC     | 428 |
| TSW-14 | GGGAGCTTCCTTAGGTTGGATTCTAATTAAGCACTCCGCCTGGGGAGTACGGTC--G        | 604 |
| TSW-19 | -----CATTAAGCACTCCGCCTGGGGAGTACGGGC--A                           | 797 |
| TSW-17 | -----AGCAAACGCATTAAGCACTCCGCCTGGGGAGTACGGTCAGA                   | 625 |
| TSW-15 | -----AGCTAAC--GCATTAAGCTCCGCCTGGGGAGTACGGTCGCA                   | 708 |
| TSW-20 | -----GTTAACGCATGTAAGCACTCCGCCTGGGGAGTACGGCCGCA                   | 792 |
| TSW-22 | -----AGCTAACGCATTAAGAACTCCGCCTGGGGAGTACGGTCGCA                   | 719 |
|        | * * * * *                                                        |     |
| TSW-10 | CACCTGTCACTCT-----GTCCCCGAAGGGAAAGCCC-----                       | 434 |
| TSW-06 | CACCTGTCACTCT-----GCCCCGAAGGGGAAGCCC-----                        | 440 |
| TSW-02 | CACCTGTCACTCT-----GTCCCCGAAGGGAAAGCC-----                        | 445 |
| TSW-05 | CACCTGTCACTCT-----GCCCCGAAGGGACGTCC-----                         | 459 |
| TSW-14 | CAAGAGAACTCAAAGGAATTGACGGGGGCC---GCACAAGCGGTGGAGCATGTGGTTT       | 661 |
| TSW-19 | AGGCTGAACTCAAAGGAATTGACGGGGGCC---GCACAAGCGGTGGAGCATGTGGTTT       | 854 |
| TSW-17 | CTGAATC----AAAGGAATTGACGGGGGCCGCACACTAAGCGGTGGAGCATGTGGTTT       | 680 |
| TSW-15 | AGACTGAACTCAAAGGAATTGACGGGGGCC---GCACAAGCGGTGGAGCATGTGGTTT       | 765 |
| TSW-20 | AGGCTGAACTCAAAGGAATTGACGGGGGCC---GCACAAGCGGTGGAGCATGTGGTTT       | 849 |
| TSW-22 | AGACTGAACTCA-AGGAATTGACGGGGGCC---GCACAAGCGGTGGAGCATGTGGTTT       | 775 |
|        | * * * *                                                          |     |
| TSW-10 | -----TATCTCTAGGGTTGTCAGAGGATGTCAAGACCTGGTAA                      | 472 |
| TSW-06 | -----TATCTCTAGGGTTGTCAGAGGATGTCAAGACCTGGTAA                      | 478 |
| TSW-02 | -----CTATCTCTAGGGTTGTCAGAGGATGTCAAGACCTGGTAA                     | 483 |
| TSW-05 | -----TATCTCTAGGATTGTCAGAGGATGTCAAGACCTGGTAA                      | 497 |
| TSW-14 | AATTCGAAGCAACGCGAAGAACCTTACCAGGTCTTGACATCCTCTGACAATCCTAGAGAT     | 721 |
| TSW-19 | ATTCGAAGCAACGCGA-AGAACCTTACCAGGTCTTGACATCCTCTGAAA--CCTAGAGAT     | 911 |
| TSW-17 | AATTCGAAGCAACGCG-A---ATTACCAGGTCTTGACATCCTCTGACAACCCTAGAGAT      | 735 |
| TSW-15 | AATTCGAAGCAACGCG-AAGAACCTTACCAGGTCTTGACATCCTCTGACAATCCTAGAGAT    | 824 |
| TSW-20 | AATTCGAAGCAACGCG-AAGAACCTTACCAGGTCTTGACATCCTCTGAAAACCCTAGAGAT    | 908 |
| TSW-22 | AATTCGAAGCAACGCG-AAGAC-TTACCAGGTCTTGACATCCTCTGACAATCCTAGAGAT     | 833 |
|        | * * * * *                                                        |     |
| TSW-10 | G-TTCTTCGCGTTGCTTCGAATTA AAC CACATGCTCCACCGCTTGTGCGGGAGCCCC-CGT  | 530 |
| TSW-06 | GGTTCTTCGCGTTGCTTCGAATTA AAC CACATGCTCCACCGCTTGTGCGGGAGCCCCCGTT  | 538 |
| TSW-02 | GGTTCTTCGCGTTGCTTCGAATTA AAC CACATGCTCCACCGCTTGTGCGGGAGCCCC--CGT | 541 |
| TSW-05 | GGTTCTTCGCGTTGCTTCGAATTA AAC CACATGCTCCACCGCTTGTGCGGGAGCCCC--CGT | 555 |
| TSW-14 | AGGACGTCCCCTTCGGGGGCAGAGTGACAGGTGGTGCATGGTTGTCG-----T            | 769 |
| TSW-19 | AGGGCTTCTCCTTCGGGGGCAGAGTGACAGGTGGT-----                         | 946 |
| TSW-17 | AGGGCTTCCCCTTCGGGGGCAGAGTGACAGGTGGTGCATGTCGTCAG-----C3           |     |
| TSW-15 | AGGACGTCCCCTTCGGGGGCAGAGTGACAGGTGGTGCATGGTTGTCG-----T            | 872 |
| TSW-20 | AGGGCTTCTCCTTCGGGGGCAGAAAGACAGGTGGTGCATGGTTGTCG-----T            | 956 |
| TSW-22 | AGACG-TCCCCTTCGGGGGCAGAGTGACAGGTGGTGCATGGTTGTCG-----T            | 880 |

|        |                                                               |     |           |      |
|--------|---------------------------------------------------------------|-----|-----------|------|
|        | * * * * *                                                     | * * | * * * * * |      |
| TSW-10 | CAATTCCTTTGAGTTTCAGTCTTGCACCGTACTC-CCCAGGCGGAGTGGTGCTTAATGC   |     |           | 589  |
| TSW-06 | CAATTCCTTTGAGTTTCAGTCTTGCACCGTACTCCCCGAGGCGGAGTGCTT--AATGCG   |     |           | 596  |
| TSW-02 | CAATTCCTTTGAGTTTCAGTCTT-GCGACCGTACTCCCCAGGCGGAGTGCTT--AATGCG  |     |           | 598  |
| TSW-05 | CAATTCCTTTGAGTTTCAGTCTTGCACCGTACTCCCCAGGCGGAGTGCTT--AATGCG    |     |           | 613  |
| TSW-14 | CAGCTCGTGTCTGTG-AGATGTTGGGTTAAGTCCCGCAACGAGCGCAACCCTTGATCTTAG |     |           | 828  |
| TSW-19 | -----                                                         |     |           | 946  |
| TSW-17 | TCG----T-----C-GTGAGATGTGGTAAAGCCGCAACGAGCGCAACCCTTGATCTTAG   |     |           | 833  |
| TSW-15 | CAGCTCGTGTCTGTG-AGATGTTGGGTTAAGTCCCGCAACGAGCGCAACCCTTGATCTTAG |     |           | 931  |
| TSW-20 | CAGCTCGT---GTCGAGATGTTGGGTTAAGTCCCGCAACGAGCGCAACCCTTGATCTTAG  |     |           | 1013 |
| TSW-22 | CAGCTCGTGTCTGTCTAGATGTTGGGTTAAGTCCCGCAACGAGCGCAACCCTTGATCTTAG |     |           | 940  |

**Fig. 7. Multiple Sequence Alignment of different metal resistant *Bacillus* strains showing conserved sequences with asterisks and genetic variations with grey highlights.**

bioRxiv preprint doi: <https://doi.org/10.1101/2021.11.12.468455>; this version posted November 12, 2021. The copyright holder for this preprint (which was not certified by peer review) is the author/funder. This article is a US Government work. It is not subject to copyright under 17 USC 105 and is also made available for use under a CC0 license.

**Table 1.** Colony characteristics of the isolated filamentous fungi

| Strain ID | Color of colony on ME agar medium                              | Microscopic attributes                                                                                                      | Identified general/ species      |
|-----------|----------------------------------------------------------------|-----------------------------------------------------------------------------------------------------------------------------|----------------------------------|
| TSWF-1    | black                                                          | Hyphae branched, brown, and septate; conidia pale brown, obpyriform, smooth-walled and ovoid with a short cylindrical stalk | <i>Alternaria alternata</i>      |
| TSWF-2    | green                                                          | Conidia unicellular, subglobose and light green in color on tip of phialides                                                | <i>Trichoderma</i> sp.           |
| TSWF-3    | light to dark green                                            | Hyphae smooth, branched, and hyaline having phialides with unicellular, subglobose and light green colored conidia          | <i>Trichoderma</i> sp.           |
| TSWF-4    | black                                                          | Conidiophores long and septate having metulae and phialides                                                                 | <i>Aspergillus niger</i>         |
| TSWF-5    | colony appeared green on the periphery and white in the center | Hyphae smooth, hyaline and having unicellular, subglobose, and green colored conidia on phialides tip                       | <i>Trichoderma</i> sp.           |
| TSWF-6    | green                                                          | Hyphae smooth, branched and hyaline having phialide carried light green, globose to subglobose, and unicellular conidia     | <i>Trichoderma</i> sp.           |
| TSWF-7    | greyish green                                                  | Conidiophores colorless, smooth-walled and long, whereas conidia smooth and subglobose                                      | <i>Aspergillus penicilloides</i> |
| TSWF-8    | whitish with cottony and flat texture                          | Macroconidia hyaline, slightly falcate and septate; microconidia cylindrical or ellipsoidal with false heads                | <i>Fusarium oxysporum</i>        |
| TSWF-9    | purplish-white in color                                        | Hyphae branched and erect having unicellular, cylindrical, and ellipsoidal microconidia                                     | <i>Fusarium</i> sp.              |
| TSWF-10   | greenish-white                                                 | Conidiophores branched having phialides; conidia unicellular, thick-walled, light green and subglobose                      | <i>Trichoderma</i> sp.           |
| TSWF-11   | greenish-white                                                 | Conidia unicellular, subglobose, thick-walled, and light green conidia on phialide                                          | <i>Trichoderma</i> sp.           |
| TSWF-12   | olive green                                                    | Hyphae smooth, septate and hyaline; conidia green in color, thin-walled and subspherical.                                   | <i>Aspergillus flavus</i>        |

bioRxiv preprint doi: <https://doi.org/10.1101/2021.11.12.468455>; this version posted November 12, 2021. The copyright holder for this preprint (which was not certified by peer review) is the author/funder. This article is a US Government work. It is not subject to copyright under 17 USC 105 and is also made available for use under a CC0 license.

Table 2. Biochemical characteristics of isolated bacterial strains

| Isolates | Gram Stain | Spore Stain | Cell Shape | Catalase Test | Oxidase | Starch | MR test | VP Test | Genus Name               |
|----------|------------|-------------|------------|---------------|---------|--------|---------|---------|--------------------------|
| TSW-1    | +ve        | +ve         | Round      | +ve           | +ve     | +ve    | -ve     | -ve     | <i>Micrococcus</i> sp    |
| TSW-2    | +ve        | +ve         | Rod        | +ve           | +ve     | -ve    | +ve     | -ve     | <i>Bacillus</i> sp       |
| TSW-3    | -ve        | -ve         | Rod        | +ve           | -ve     | +ve    | -ve     | +ve     | <i>Klebsiella</i> sp     |
| TSW-4    | -ve        | -ve         | Rod        | +ve           | -ve     | -ve    | +ve     | ve      | <i>Escherichia</i> sp.   |
| TSW-5    | +ve        | +ve         | Rod        | +ve           | +ve     | +ve    | +ve     | -ve     | <i>Bacillus</i> sp       |
| TSW-6    | +ve        | +ve         | Rod        | -ve           | +ve     | -ve    | +ve     | -ve     | <i>Bacillus</i> sp       |
| TSW-7    | -ve        | -ve         | Round      | -ve           | -ve     | -ve    | -ve     | -ve     | <i>Micrococcus</i> sp    |
| TSW-8    | +ve        | +ve         | Rod        | +ve           | +ve     | +ve    | -ve     | -ve     | <i>Pseudomonas</i> sp    |
| TSW-9    | +ve        | +ve         | Rod        | +ve           | +ve     | +ve    | -ve     | +ve     | <i>Bacillus</i> sp       |
| TSW-10   | +ve        | +ve         | Rod        | -ve           | +ve     | -ve    | +ve     | -ve     | <i>Bacillus</i> sp       |
| TSW-11   | +ve        | +ve         | Rod        | +ve           | +ve     | +ve    | +ve     | +ve     | <i>Bacillus</i> sp       |
| TSW-12   | +ve        | +ve         | Rod        | +ve           | +ve     | +ve    | -ve     | +ve     | <i>Pseudomonas</i> sp    |
| TSW-13   | +ve        | -ve         | Round      | +ve           | -ve     | +ve    | -ve     | -ve     | <i>Streptococcus</i> sp. |
| TSW-14   | +ve        | +ve         | Rod        | +ve           | +ve     | +ve    | +ve     | -ve     | <i>Bacillus</i> sp       |
| TSW-15   | +ve        | +ve         | Rod        | +ve           | +ve     | +ve    | +ve     | -ve     | <i>Bacillus</i> sp       |
| TSW-16   | +ve        | +ve         | Rod        | +ve           | +ve     | -ve    | -ve     | +ve     | <i>Pseudomonas</i> sp    |
| TSW-17   | +ve        | +ve         | Rod        | +ve           | +ve     | +ve    | -ve     | -ve     | <i>Bacillus</i> sp       |
| TSW-18   | +ve        | +ve         | Rod        | -ve           | +ve     | -ve    | +ve     | -ve     | <i>Bacillus</i> sp       |
| TSW-19   | -ve        | -ve         | Rod        | +ve           | -ve     | +ve    | -ve     | +ve     | <i>Klebsiella</i> sp     |
| TSW-20   | +ve        | +ve         | Rod        | -ve           | +ve     | +ve    | -ve     | -ve     | <i>Bacillus</i> sp       |
| TSW-21   | +ve        | +ve         | Rod        | +ve           | +ve     | +ve    | -ve     | -ve     | <i>Pseudomonas</i> sp    |
| TSW-22   | +ve        | +ve         | Rod        | -ve           | +ve     | +ve    | -ve     | -ve     | <i>Bacillus</i> sp       |
| TSW-23   | +ve        | -ve         | Round      | +ve           | +ve     | -ve    | -ve     | -ve     | <i>Streptococcus</i> sp. |
| TSW-24   | -ve        | -ve         | Round      | +ve           | -ve     | -ve    | -ve     | -ve     | <i>Micrococcus</i> sp    |
| TSW-25   | +ve        | +ve         | Rod        | +ve           | +ve     | +ve    | +ve     | +ve     | <i>Bacillus</i> sp       |

+ve: positive, -ve: negative, MR: methyl red, VP: Voges Proskauer

bioRxiv preprint doi: <https://doi.org/10.1101/2021.11.12.468455>; this version posted November 12, 2021. The copyright holder for this preprint (which was not certified by peer review) is the author/funder. This article is a US Government work. It is not subject to copyright under 17 USC 105 and is also made available for use under a CC0 license.

**Table 3.** Minimum inhibitory concentration (MIC) of fungal strains isolated from TSW against six different metals (mg L<sup>-1</sup>) shown in the form of a heatmap.

| Fungal Isolates | Pb   | Cd  | Cr  | Zn  | Cu  | Hg  | Order of metal resistance   |
|-----------------|------|-----|-----|-----|-----|-----|-----------------------------|
| TSWF-1          | 700  | 250 | 700 | 450 | 350 | 50  | Pb, Cr > Zn > Cu > Cd > Hg  |
| TSWF-2          | 1050 | 150 | 350 | 400 | 450 | 100 | Pb > Cu > Zn > Cr > Cd > Hg |
| TSWF-3          | 1000 | 150 | 750 | 150 | 450 | 10  | Pb > Cr > Cu > Zn, Cd > Hg  |
| TSWF-4          | 900  | 350 | 800 | 600 | 300 | 50  | Pb > Cr > Zn > Cd > Cu > Hg |
| TSWF-5          | 1050 | 200 | 650 | 500 | 350 | 50  | Pb > Cr > Zn > Cu > Cd > Hg |
| TSWF-6          | 300  | 400 | 250 | 150 | 150 | 100 | Cd > Pb > Cr > Zn, Cu > Hg  |
| TSWF-7          | 900  | 250 | 600 | 550 | 250 | 0   | Pb > Cr > Zn > Cu, Cd > Hg  |
| TSWF-8          | 800  | 150 | 350 | 500 | 450 | 50  | Pb > Zn > Cu > Cr > Cd > Hg |
| TSWF-9          | 700  | 250 | 400 | 500 | 200 | 10  | Cr > Cd > Zn, Pb > Cu > Hg  |
| TSWF-10         | 550  | 350 | 750 | 650 | 150 | 50  | Cr > Zn > Pb > Cd > Cu > Hg |
| TSWF-11         | 300  | 100 | 800 | 650 | 450 | 10  | Cr > Zn > Cu > Pb > Cd > Hg |
| TSWF-12         | 550  | 150 | 250 | 300 | 300 | 0   | Pb > Zn, Cu > Cr > Cd > Hg  |

bioRxiv preprint doi: <https://doi.org/10.1101/2021.11.12.468455>; this version posted November 12, 2021. The copyright holder for this preprint (which was not certified by peer review) is the author/funder. This article is a US Government work. It is not subject to copyright under 17 USC 105 and is also made available for use under a CC0 license.

Green color represents the maximum resistance to metal while red represents the lowest resistance to metal by the isolated fungal strain (n=12).

**Table 4.** Minimum inhibitory concentration (MIC) of bacterial isolates against six different metals (mg L<sup>-1</sup>)

| Isolates | Pb   | Cd  | Cr  | Zn  | Cu  | Hg | Order of metal resistance   |
|----------|------|-----|-----|-----|-----|----|-----------------------------|
| TSW-1    | 900  | 150 | 650 | 100 | 300 | 20 | Pb > Cr > Cu > Cd > Zn > Hg |
| TSW-2    | 650  | 150 | 950 | 600 | 600 | 20 | Cr > Pb > Cu, Zn > Cd > Hg  |
| TSW-3    | 600  | 100 | 350 | 250 | 600 | 50 | Pb > Cu > Cr > Zn > Cd > Hg |
| TSW-4    | 400  | 50  | 900 | 700 | 650 | 20 | Cr > Zn > Cu > Pb > Cd > Hg |
| TSW-5    | 650  | 600 | 350 | 250 | 250 | 50 | Pb > Cd > Cr > Zn, Cu > Hg  |
| TSW-6    | 1200 | 300 | 200 | 250 | 100 | 20 | Pb > Cd > Zn > Cr > Cu > Hg |
| TSW-7    | 850  | 100 | 600 | 100 | 100 | 20 | Pb > Cr > Cu, Zn, Cd > Hg   |
| TSW-8    | 1200 | 100 | 650 | 250 | 600 | 20 | Pb > Cr > Cu > Zn > Cd > Hg |
| TSW-9    | 600  | 300 | 300 | 400 | 650 | 20 | Cu > Pb, Zn > Cd > Cr > Hg  |
| TSW-10   | 400  | 600 | 600 | 250 | 650 | 20 | Cu > Cd, Cr > Pb > Zn > Hg  |
| TSW-11   | 900  | 50  | 200 | 250 | 450 | 20 | Pb > Cu > Zn > Cr > Cd > Hg |
| TSW-12   | 1000 | 150 | 950 | 450 | 600 | 20 | Pb > Cr > Cu > Zn > Cd > Hg |
| TSW-13   | 850  | 100 | 200 | 250 | 300 | 20 | Pb > Cu > Zn > Cr > Cd > Hg |
| TSW-14   | 350  | 150 | 950 | 400 | 450 | 20 | Cr > Cu > Zn > Pb > Cd > Hg |
| TSW-15   | 650  | 100 | 950 | 350 | 300 | 20 | Cr > Pb > Zn > Cu > Cd > Hg |
| TSW-16   | 1100 | 150 | 350 | 400 | 450 | 20 | Pb > Cu > Zn > Cr > Cd > Hg |
| TSW-17   | 1200 | 300 | 350 | 250 | 100 | 50 | Pb > Cr > Cd > Zn > Cu > Hg |
| TSW-18   | 350  | 100 | 650 | 600 | 600 | 20 | Cr > Zn, Cu > Pb > Cd > Hg  |
| TSW-19   | 850  | 50  | 350 | 700 | 100 | 50 | Pb > Zn > Cr > Cu > Cd > Hg |
| TSW-20   | 650  | 50  | 600 | 250 | 650 | 20 | Pb, Cu > Cr > Zn > Cd > Hg  |
| TSW-21   | 1100 | 150 | 950 | 250 | 100 | 50 | Pb > Cr > Zn > Cd > Cu > Hg |
| TSW-22   | 400  | 300 | 350 | 700 | 300 | 20 | Zn > Pb > Cr > Cu, Cd > Hg  |
| TSW-23   | 350  | 50  | 200 | 250 | 450 | 20 | Cu > Pb > Zn > Cr > Cd > Hg |
| TSW-24   | 650  | 100 | 900 | 50  | 600 | 50 | Cr > Pb > Cu > Cd > Zn, Hg  |
| TSW-25   | 1000 | 450 | 350 | 250 | 650 | 20 | Pb > Cu > Cd > Cr > Zn > Hg |

bioRxiv preprint doi: <https://doi.org/10.1101/2021.11.12.468455>; this version posted November 12, 2021. The copyright holder for this preprint (which was not certified by peer review) is the author/funder. This article is a US Government work. It is not subject to copyright under 17 USC 105 and is also made available for use under a CC0 license.

Green color represents the maximum resistance to metal, whereas red for the lowest resistance to metal by isolated bacterial strain (n=25).
